# Supplementary material
Source: MDPI journal article supplement (https://www.mdpi.com/2071-1050/7/9/11878)
Supplement: s1 [file s1]

*Supplementary Information*

## **A Practical Approach to Screening Potential Environmental Hotspots of Different Impact Categories in Supply Chains. *Sustainability*, 2015, 7, 11878-11892.**

**Jun Nakatani <sup>1,†,\*</sup>, Tamon Maruyama <sup>1,†</sup>, Kosuke Fukuchi <sup>1,2,†</sup> and Yuichi Moriguchi <sup>1,†</sup>**

<sup>1</sup> Department of Urban Engineering, The University of Tokyo, 7-3-1 Hongo, Bunkyo-ku, Tokyo 113-8656, Japan; E-Mails: maruyama@env.t.u-tokyo.ac.jp (T.M.); zzz.4213.kf@gmail.com (K.F.); yuichi@env.t.u-tokyo.ac.jp (Y.M.);

<sup>2</sup> Bank of Tokyo-Mitsubishi UFJ, 5-42-8 Nakakasai, Edogawa-ku, Tokyo 134-8504, Japan

† These authors contributed equally to this work.

\* Author to whom correspondence should be addressed; E-Mail: nakatani@env.t.u-tokyo.ac.jp; Tel./Fax: +81-3-5841-1279.

*Received: 12 June 2015 / Accepted: 12 August 2015 / Published: 26 August 2015*

---

### **1. Introduction**

#### *1.1. Recent Developments in Environmental Input-Output Analysis*

Current challenges regarding the life cycle inventory (LCI) phase as described in Section 1 of the body text stem from differences of the unit environmental burdens or resource consumptions for the same type and quantity of outputs (product or service) between countries or regions. Previously, this type of accounting was based on embodied environmental intensities derived from single-region input-output (SRIO) models for a specific country, such as the Embodied Energy and Emission Intensity Data for Japan Using Input-Output Tables (3EID) [1,2]. In this case, however, one must be aware that the LCIs are based on the domestic technology assumption (DTA).

As discussed in the context of EF [3], MRIO models were not precise enough to calculate various types of interventions of individual products, and their sector resolutions were not high as compared with those of SRIO models. In recent years, various multi-region input-output (MRIO) models have provided embodied intensities of greenhouse gases (GHGs) and other substances that take into account the import and export. Cases exist in which accounting has been done for embodied carbon dioxide (CO<sub>2</sub>) emissions in import and export for various countries around the world [4]. There is also a model and database that includes water consumption [5,6]. The global link input-output (GLIO) model that calculates the embodied intensities of global environmental burdens (GHGs and acidifying substances)

for Japanese domestically produced products (406 sectors) has not yet taken water resources into account [1,7].

### *1.2. Recent Developments in Life Cycle Impact Assessment*

From the life cycle impact assessment (LCIA) perspective, the same amount of emissions from any part of the world can be deemed to have an equal amount of impact in terms of global warming. In impact categories, such as terrestrial acidification, however, the impacts are determined by atmospheric, soil, and other environmental conditions specific to each region. For such regional environmental impacts, the interventions are not simply added; the LCI must be aggregated for each nation/region and then characterized considering the region-dependent conditions.

Accurately determining regional dependency is an outstanding challenge in LCIA [8,9]. For impact categories that are regional or local, there are methods that include characterization factors for each country or region which take into account regionally-dependent environmental conditions, but currently these methods only target various European nations or Japan [10–16]. Moreover, ReCiPe 2008, a recently published method [17,18], recommends applying region-generic characterization factors that average the results of regionally dependent fate and exposure analyses for Europe as a whole. Though recent years have seen renewed commitment to identify the characterization factors for each nation or region [19,20], these developments are still in progress. In addition, the consistency with the above-mentioned LCIs based on EIOA in terms of regional scope or resolution is still unclear.

The impact of resource consumption (evaluated as depletion risks or surplus costs), for fossil or mineral resources that can be transported between regions, can be deemed to not be dependent on the consuming region, but for water resources, the difficulty of transportation between regions and the uneven distribution of usable volumes between nations or regions means that the impact from the consumption of the same volume is largely regionally dependent. There have been numerous water consumption characterization models proposed to reflect the differences in the environmental conditions between nations or watersheds [21].

## **2. Materials and Methods**

### *2.1. Characterization Factors*

By multiplying the amount of interventions of relevant substances by their characterization factors (impact per unit intervention) and aggregating them, the potential impact for each impact category can be derived. In this study, we used the midpoint characterization factors described below to analyze the characteristics across impact categories.

#### **2.1.1. Global Warming**

For global warming, the six substances were converted to CO<sub>2</sub> equivalents and aggregated into a unit GHG emission in 3EID (2005 table) and the GLIO model [1,7]. Of these, GHGs other than CO<sub>2</sub> are based on CO<sub>2</sub> equivalent emissions for 2005, published in the National GHGs Inventory Report of 2009 [22]. As the characterization factors for each substance, this national inventory report uses the

Global Warming Potential (GWP) with a time horizon of 100 years (GWP 100) from the Second Assessment Report of the Intergovernmental Panel on Climate Change (IPCC) [23].

### 2.1.2. Terrestrial Acidification

For terrestrial acidification, the characterization factors we applied were the average values for the Deposition-oriented Acidification Potential (DAP), which is the characterization factor for acidification used in the Life-cycle Impact assessment Method based on Endpoint modeling (LIME 2), an LCIA method developed in Japan [24]. For nitrous oxides (NO<sub>x</sub>) and sulfur oxides (SO<sub>x</sub>), we used the DAPs for nitrogen dioxide (NO<sub>2</sub>) and sulfur dioxide (SO<sub>2</sub>), respectively. The DAP [kg SO<sub>2</sub> eq/kg] for acidifying substance  $x$  is the respective Atmospheric Deposition Factor (ADF), expressed in SO<sub>2</sub> equivalents, and is described by Equation (S1) [24,25].

$$DAP(x) = ADF(x)/ADF(SO_2) \quad (S1)$$

Including LIME 2, the midpoint characterization factors for acidification (terrestrial or marine) in the LCIA are often the potential impacts on ecosystems per unit emissions of each substance converted into SO<sub>2</sub> equivalents [12–18,24–27]. The differences between methods are in their definition of impacts, and there are several types: substance dependent characterization factors based solely on the number of hydrogen ions potentially produced  $\eta(x)$  [eq/kg] for each substance (called Generic AP) [26,27], regionally dependent characterization factors that take into account the atmospheric transfer coefficient and the deposition area of acidifying substances as well as critical load of the soil as regional environmental conditions [10–14,27–30], and region-generic characterization factors that take base saturation into account [17,18]. The ADF [eq/km<sup>2</sup>/kg] in LIME 2 is described using Equation (S2) [24,25].

$$ADF(x) = SRR(x) \cdot \eta(x) \cdot NNR(x)/A_{Japan}^L \quad (S2)$$

Here, in addition to the number of hydrogen ions potentially produced and the non-neutralization ratio (NNR) of each substance, the source–receptor relationship (SRR) of each substance emitted in Japan and the land area of Japan  $A_{Japan}^L$  [km<sup>2</sup>] are taken into consideration. The SRR is synonymous with the atmospheric transfer coefficient. As such, the DAP is deemed to be a regionally dependent characterization factor that assumes the environmental conditions in Japan.

### 2.1.3. Water Resource Consumption

For water resource consumption, we applied the Water Stress Indicator (WSI) [31,32], which has been proposed as a midpoint characterization factor. The WSI [m<sup>3</sup>·water·eq] is calculated using Equation (S3) below for each water category  $i$ , with respect to water source and water quality. The equation deducts the volumes of water released  $V_i^{out}$  [m<sup>3</sup>] from the volumes of water withdrawn  $V_i^{in}$  [m<sup>3</sup>], which is weighted by the stress index  $\alpha_i$ . This shows the availability of water resources of which other competing users are deprived as a consequence of water use [32].

$$WSI = \sum_i \alpha_i \cdot V_i^{in} - \sum_i \alpha_i \cdot V_i^{out} \quad (S3)$$

However, in the calculation of interventions in the EIOA, the water quality level at the source of water extraction and the destination of the water released is difficult to identify, so strictly, the WSI equation above cannot be applied. In this article, “water consumption,” referred to in Section 2.2 of the body text, is defined as water that cannot be returned to the same water source from which it was withdrawn [33,34], therefore we approximated the WSI using Equation (S4). In other words, water consumption  $\tilde{V}_i$  [m<sup>3</sup>] for each water source (river water, ground water, and rain water) was multiplied by  $\alpha_i$  of the average water quality level (surface water: S2b, ground water: G2b) of Japan, and then these results were aggregated into a total

$$WSI = \sum_i \alpha_i \cdot (V_i^{in} - V_i^{out}) \approx \sum_i \alpha_i \cdot \tilde{V}_i \quad (S4)$$

From the above, to gain an understanding of the potential impacts of water resource consumption abroad, an awareness is of the uneven distributions of water availability among nations or regions is necessary. The unevenness leads to uncertainty at the LCIA stage, in addition to uncertainties in the LCI. Note that for ground water in Japan, the  $\alpha_i$  value is set to be smaller than that in other nations (see Table 1 of the body text), so the impact of ground water consumption per unit is smaller. For example, the  $\alpha_i$  value for ground water (G2b) in China and the United States, which are Japan’s top two import partners in 2012 [35], were respectively 0.620 and 0.510, and within the top ten nations (excluding Middle Eastern countries where  $\alpha_i$  has not been defined), the only nation with a smaller  $\alpha_i$  value for groundwater (G2b) than Japan is Malaysia [31].

## 2.2. Domestic Ratios of Potential Impacts

As described in Section 2.4 of the body text, the potential impacts that arise domestically and abroad are categorized on the basis of the embodied environmental intensities under the DTA and those excluding the input of imports using Equations (3) and (4). We can easily see, by looking at those equations, that the sum of the domestic and foreign potential impacts results in  $\tilde{\mathbf{E}} \cdot (\mathbf{I} - \mathbf{A})^{-1}$ , and the sum of column  $k$  matches the embodied environmental intensity  $Q_k$  under the DTA.

Moreover, as shown in Equation (S5), the sum of element  $q_{ik}^D$  in column  $k$  of  $\mathbf{Q}^D$  as a ratio of the embodied intensity  $Q_k$  is hereinafter called the “domestic ratio” of product  $k$ . Similarly the column sum of element  $q_{ik}^F$  of  $\mathbf{Q}^F$  as a ratio of  $Q_k$  in Equation (S6) is called the “foreign ratio”.

$$\sum_i q_{ik}^D / Q_k \quad (S5)$$

$$\sum_i q_{ik}^F / Q_k \quad (S6)$$

However, it is important to be aware that these equations are based on the following assumptions: (a) spillover production activities induced abroad through the import by domestic economic activity are assumed to not induce further domestic production (*i.e.*, all production activities are induced abroad); (b) the input coefficients, unit direct interventions, and

characterization factors of each sector outside of the country are assumed to be the same as those within the country.

### 2.3. Domestic Ratios by Each Tier of the Supply Chain

The embodied environmental intensities that have been categorized as either domestic or foreign are further categorized into direct and subsequent tiers ( $t$ -th tier) as described by Equations (5)–(7) of the body text, which are made clear from the definitions in the Leontief inverse matrix. When the impacts from each tier are totaled from direct to an infinite tier of the supply chain, domestically it becomes  $\tilde{\mathbf{E}} \cdot (\mathbf{I} - (\mathbf{I} - \mathbf{M})\mathbf{A})^{-1}$ , and abroad it becomes  $\tilde{\mathbf{E}} \cdot (\mathbf{I} - \mathbf{A})^{-1} - \tilde{\mathbf{E}} \cdot (\mathbf{I} - (\mathbf{I} - \mathbf{M})\mathbf{A})^{-1}$ . These values match Equations (3) and (4) of the body text that differentiate between domestic and foreign potential impacts.

Here, element  $q_{ik}^{D(t)}$  in a certain row  $i$  of  $\mathbf{Q}^{D(t)}$  provides the impact induced by product  $k$  in the domestic sector  $i$  at the  $t$ -th tier of the supply chain. Similarly, element  $q_{ik}^{F(t)}$  of  $\mathbf{Q}^{F(t)}$  shows the potential impact induced by product  $k$  in a foreign production activity that corresponds to sector  $i$  at the  $t$ -th tier of the supply chain. At this point, the domestic and foreign ratios at the  $t$ -th tier are described by Equations (S7) and (S8), respectively.

$$\sum_i q_{ik}^{D(t)} / \left( \sum_i q_{ik}^{D(t)} + \sum_i q_{ik}^{F(t)} \right) \quad (\text{S7})$$

$$\sum_i q_{ik}^{F(t)} / \left( \sum_i q_{ik}^{D(t)} + \sum_i q_{ik}^{F(t)} \right) \quad (\text{S8})$$

### 2.4. Rates of Foreign Potential Impacts

As shown in Equation (S9) below, the column sum of  $q_{ik}^{D(t)}$  as a ratio of the embodied environmental intensity  $Q_k$  under the DTA, is called the “rate of domestic impact” at the  $t$ -th tier for product  $k$ . Similarly, as shown in Equation (S10), the column sum of  $q_{ik}^{F(t)}$  as a ratio of the embodied environmental intensity  $Q_k$  is called the “rate of foreign impact” at the  $t$ -th tier for product  $k$ . At this point, the total of these values, from direct to an infinite tier of the supply chain, matches the domestic and foreign ratios described by Equations (5) and (6) of the body text.

$$\sum_i q_{ik}^{D(t)} / Q_k \quad (\text{S9})$$

$$\sum_i q_{ik}^{F(t)} / Q_k \quad (\text{S10})$$

### 2.5. Potential Impacts Associated with the Import of Raw Materials

The underlying concept of the accounting method for determining the potential impacts associated with import is shown in Figure S1.

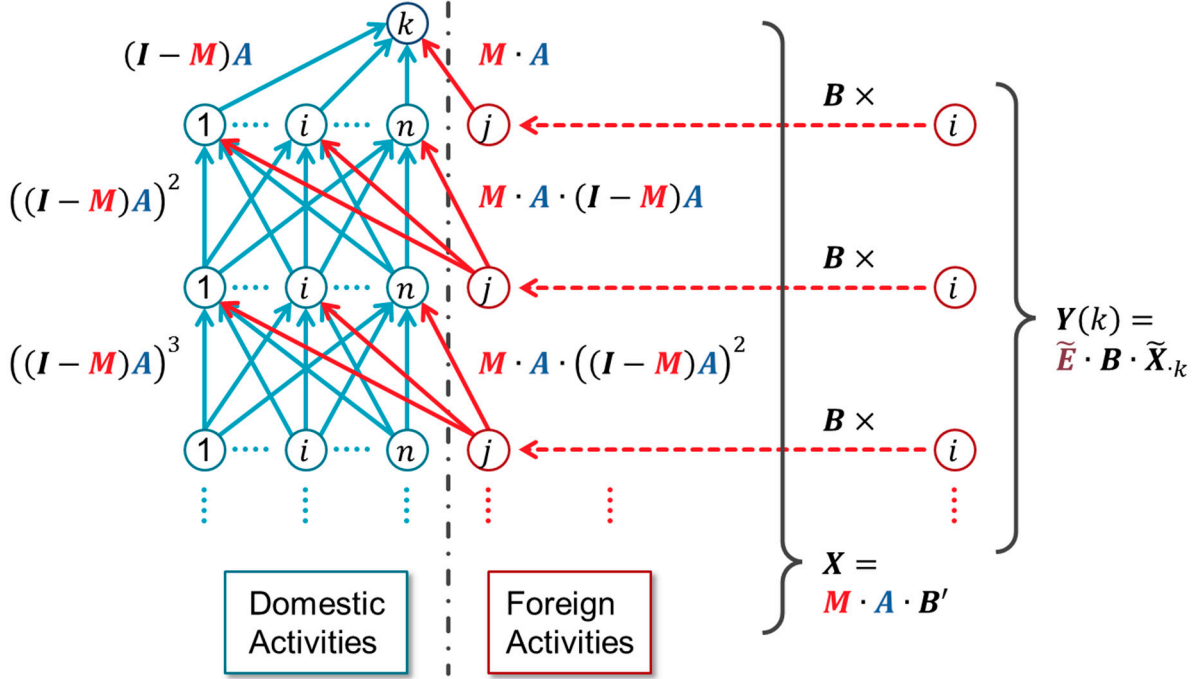

**Figure S1.** Conceptual schematic of the accounting method used to determine potential impacts associated with the import of raw materials. Note:  $k$  is the product subject to analysis,  $j$  is the imported raw material,  $i$  is the sector where potential impacts are induced.  $n$  is the number of sectors in the input-output table and in this study, there are 403 sectors.  $A$  is the input coefficient matrix,  $M$  is the import coefficient matrix,  $\tilde{E}$  is the diagonal matrix that deploys the unit impact in each sector as the diagonal component.  $B$  is the Leontief inverse matrix:  $B = (I - A)^{-1}$  and  $B' = (I - (I - M)A)^{-1}$ . Refer to Equations (10) and (11) of the body text for  $X$ ,  $\tilde{X}_k$  and  $Y(k)$ . The solid-line arrow shows that products from the sector at the end of the arrow are directly input to the sector at the root of the arrow. Dotted-line arrow shows that the sector at the root induces potential impacts to the sector at the end of the arrow.

### 3. Results

#### 3.1. Domestic Ratios of Potential Impacts

We calculated the domestic ratio of the embodied intensities of the potential impacts under the DTA in each sector and compared the results across all impact categories. The domestic ratios of the GWP and DAP tend to be higher and are 0.6 or higher in the majority of sectors, while the domestic ratio of the WSI is low in some sectors. The domestic ratios in each sector for the GWP and DAP show similar values: in the above scatter chart of Figure S2, the distribution is located diagonally. This is due to a correlation of the unit impacts across sectors between the GWP and DAP, where the simple correlation coefficient is 0.714. On the other hand, when the domestic ratios of the GWP and WSI are compared, as shown in the below scatter chart of Figure S2, we see that many sectors have a greater GWP value. This relates to the weak correlation between the impact per unit of the GWP and WSI, where the simple correlation coefficient is  $-0.001$ .

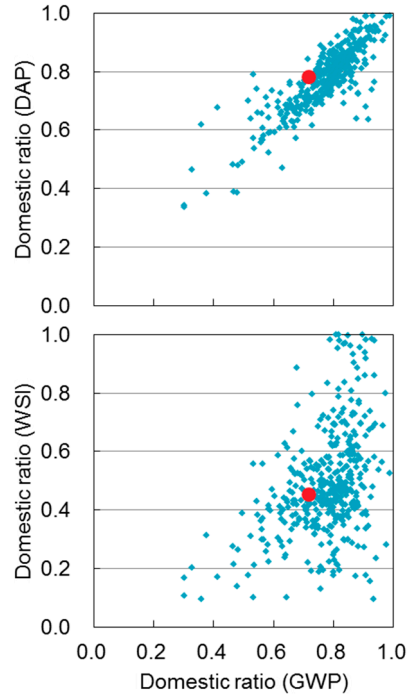

**Figure S2.** Domestic ratios of embodied environmental intensities for the 403 sectors of Japanese products: comparison of GWP with DAP and WSI. Note: The red dots show the domestic ratios of the *fiber yarns* sector.

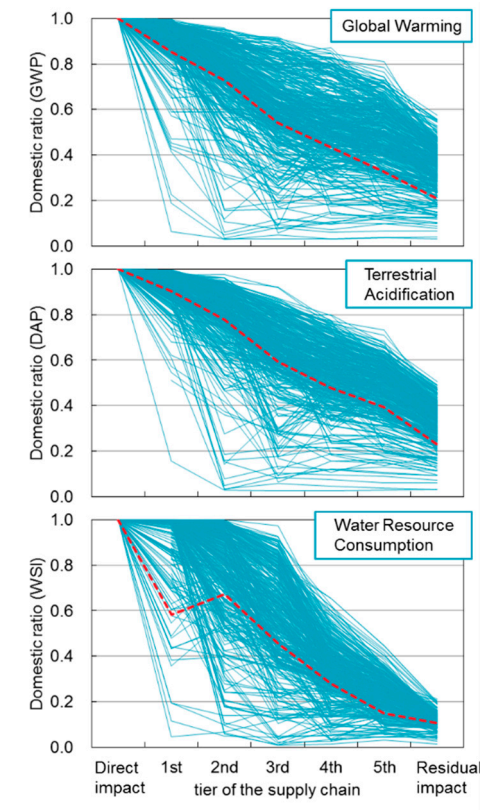

**Figure S3.** Domestic ratios of the potential impacts by each tier of the supply chain for the 403 sectors of Japanese products. Note: The red dotted lines show the domestic ratios of the *fiber yarns* sector.

### 3.2. Domestic Ratios by Each Tier of the Supply Chain

We derived domestic ratios by the tier of the supply chain for each sector. Although declining trends following the tier are common, generally, the WSI domestic ratio is lower than those of the GWP or DAP (Figure S3). Notably, in the deeper tiers (further upstream) of the supply chain, the domestic ratios for the WSI are low. In nearly all sectors, domestic ratios in the fourth tier were less than 0.6 and those in the fifth tier were less than 0.4.

### 3.3. Rates of Foreign Potential Impacts

The rates of foreign impacts in the GWP and DAP are generally low for all tiers (see Figure 1 of the body text). The causal factor for this result is the small import rates in sectors  $i$  with large unit impacts for the GWP and DAP and in sectors  $j$  which induce production in such sectors  $i$ . The top sectors  $i$  in terms of unit impacts and their import coefficients are *cement*: 0.015, *private power generation*: 0.000, *pig iron*: 0.018, and *electricity*: 0.000. The top sectors  $j$  in terms of elements  $b_{ij}$  in  $\mathbf{B} = (\mathbf{I} - \mathbf{A})^{-1}$  and their import coefficients are *ready mixed concrete*: 0.000, *crude steel (converters)*: 0.000, *hot rolled steel*: 0.039, and *compressed gas and liquefied gas*: 0.022.

However, some exceptions include *copper* and *non-ferrous metals*, where the rates of foreign impacts in the second tier are approximately 0.45 to 0.50, and *petroleum refinery products* and *gas supply* where the rates of foreign impacts for the GWP in the first and second tiers are approximately 0.27. For *copper* and *non-ferrous metals*, *metallic ores* have an import coefficient of 0.989 and for *petroleum refinery products* and *gas supply*, the import coefficient for *coal mining*, *crude petroleum* and *natural gas* are very high, 0.991, thereby causing the high rates of foreign impacts.

### 3.4. Potential Impacts Associated with the Import of Raw Materials

For potential impacts induced by Japanese domestically produced fiber yarns in foreign production activities that correspond to sectors  $i$ , contributions from the import of raw materials  $j$  were identified as described in Section 3.5 of the body text. The top ten pairings for the *fiber yarns* sector are shown in Tables S1–S3. Contributions to the embodied GWP and DAP intensities claim more than 2% only for potential impacts that *other inedible crops* (including raw cotton) and *synthetic fibers* induce in their own sectors, respectively. According to trade statistics [35], the United States (10 billion JPY) was the top trading partner in 2005 for imports corresponding to raw cotton in the input-output table (HS code: 1404.20-000, 5201.00-000). Similarly, Taiwan (13 billion JPY) was at the top for imported products corresponding to *synthetic fibers*.

Foreign potential impacts of pairings between *wood chips*, *pulp*, *logs* as imported raw materials  $j$  and *silviculture* as sector  $i$  claim 6.3%, 2.1%, and 1.7% of the embodied WSI intensity under the DTA. Furthermore, the domestic and foreign potential impact that fiber yarns induced in silviculture is 15.883 m<sup>3</sup> water eq/million JPY, and approximately half of this amount (30.3%, 10.1% and 8.0%, respectively) are induced through the import of wood chips, pulp, and logs. Of these raw materials  $j$ , the import coefficient of wood chips is 0.768. According to trade statistics [35], of all the trading partners in 2005 for imports that correspond to wood chips in the Japanese input-output table (HS



code: 4401.21-000, 4401.22-000, 4404.10-290, 4404.20-290), Australia (79 billion JPY) and South Africa (52 billion JPY) were at the top.

**Table S1.** Top ten pairings in terms of the GWP impacts associated with import of raw materials induced by Japanese fiber yarns.

| <b>Raw Material <i>j</i><br/>Being Imported</b> | <b>Sector <i>i</i> Where Potential Impacts<br/>are Induced</b> | <b>Foreign Potential Impacts<br/>(t·CO<sub>2</sub>·eq/million JPY)</b> |
|-------------------------------------------------|----------------------------------------------------------------|------------------------------------------------------------------------|
| Other inedible crops                            | Other inedible crops                                           | 0.243 (4.1%)                                                           |
| Coal mining, crude petroleum and natural gas    | Coal mining, crude petroleum and natural gas                   | 0.112 (1.9%)                                                           |
| Synthetic fibers                                | Synthetic fibers                                               | 0.082 (1.4%)                                                           |
| Coal mining, crude petroleum and natural gas    | Private power generation                                       | 0.064 (1.1%)                                                           |
| Cyclic intermediates                            | Cyclic intermediates                                           | 0.051 (0.9%)                                                           |
| Synthetic fibers                                | Private power generation                                       | 0.050 (0.9%)                                                           |
| Synthetic dyes                                  | Synthetic dyes                                                 | 0.050 (0.8%)                                                           |
| Rayon and acetate                               | Rayon and acetate                                              | 0.040 (0.7%)                                                           |
| Coal mining, crude petroleum and natural gas    | Electricity                                                    | 0.040 (0.7%)                                                           |
| Other inedible crops                            | Chemical fertilizer                                            | 0.036 (0.6%)                                                           |

Note: Figures within parentheses indicate percentages in terms of the embodied GWP intensity of the *fiber yarns* sector under the DTA.

**Table S2.** Top ten pairings in terms of the DAP impacts associated with import of raw materials induced by Japanese fiber yarns.

| <b>Raw Material <i>j</i><br/>Being Imported</b> | <b>Sector <i>i</i> Where Potential Impacts<br/>are Induced</b> | <b>Foreign Potential Impacts<br/>(kg·SO<sub>2</sub>·eq/million JPY)</b> |
|-------------------------------------------------|----------------------------------------------------------------|-------------------------------------------------------------------------|
| Synthetic fibers                                | Synthetic fibers                                               | 0.262 (2.5%)                                                            |
| Coal mining, crude petroleum and natural gas    | Private power generation                                       | 0.148 (1.4%)                                                            |
| Synthetic fibers                                | Private power generation                                       | 0.117 (1.1%)                                                            |
| Other inedible crops                            | Other inedible crops                                           | 0.097 (0.9%)                                                            |
| Synthetic dyes                                  | Private power generation                                       | 0.063 (0.6%)                                                            |
| Cyclic intermediates                            | Private power generation                                       | 0.062 (0.6%)                                                            |
| Cyclic intermediates                            | Cyclic intermediates                                           | 0.057 (0.5%)                                                            |
| Synthetic dyes                                  | Synthetic dyes                                                 | 0.055 (0.5%)                                                            |
| Coal mining, crude petroleum and natural gas    | Electricity                                                    | 0.050 (0.5%)                                                            |
| Cyclic intermediates                            | Petroleum refinery products                                    | 0.045 (0.4%)                                                            |

Note: Figures within parentheses indicate percentages in terms of the embodied DAP intensity of the *fiber yarns* sector under the DTA.

**Table S3.** Top ten pairings in terms of the WSI impacts associated with import of raw materials induced by Japanese fiber yarns.

| <b>Raw Material <i>j</i><br/>Being Imported</b> | <b>Sector <i>i</i> Where Potential Impacts<br/>are Induced</b> | <b>Foreign Potential Impacts<br/>(m<sup>3</sup>·water·eq/million JPY)</b> |
|-------------------------------------------------|----------------------------------------------------------------|---------------------------------------------------------------------------|
| Other inedible crops                            | Other inedible crops                                           | 6.494 (8.6%)                                                              |
| Wood chips                                      | Silviculture                                                   | 4.810 (6.3%)                                                              |
| Other edible crops                              | Other edible crops                                             | 2.753 (3.6%)                                                              |
| Other livestock                                 | Crops for feed<br>and foraging                                 | 2.442 (3.2%)                                                              |
| Other inedible crops                            | Rice                                                           | 1.886 (2.5%)                                                              |
| Coal mining, crude petroleum and<br>natural gas | Silviculture                                                   | 1.884 (2.5%)                                                              |
| Other livestock                                 | Other edible crops                                             | 1.764 (2.3%)                                                              |
| Synthetic fibers                                | Industrial water supply                                        | 1.633 (2.2%)                                                              |
| Pulp                                            | Silviculture                                                   | 1.597 (2.1%)                                                              |
| Logs                                            | Silviculture                                                   | 1.269 (1.7%)                                                              |

Note: Figures within parentheses indicate percentages in terms of the embodied WSI intensity of the *fiber yarns* sector under the DTA.

For Japanese products in all 403 sectors, the contribution from importing raw material *j* within all potential impacts induced in a foreign production activity that corresponds to sector *i* was identified using the method described in Section 2.5 of the body text. For the GWP, DAP, and WSI, the pairings of raw material *j* and sector *i* that carry the largest potential impacts are shown in Table S4.

**Table S4.** The pairing with the largest foreign potential impact associated with import of raw materials induced by Japanese products in each sector.

|                                | GWP (t·CO <sub>2</sub> ·eq/million JPY) |                                                     |                          | DAP (kg·SO <sub>2</sub> ·eq/million JPY) |                                                     |                          | WSI (m <sup>3</sup> ·water·eq/million JPY) |                                                     |                          |
|--------------------------------|-----------------------------------------|-----------------------------------------------------|--------------------------|------------------------------------------|-----------------------------------------------------|--------------------------|--------------------------------------------|-----------------------------------------------------|--------------------------|
|                                | Imported Raw Material <i>j</i>          | Sector <i>i</i> Where Potential Impacts are Induced | Foreign Potential Impact | Imported Raw Material <i>j</i>           | Sector <i>i</i> Where Potential Impacts are Induced | Foreign Potential Impact | Imported Raw Material <i>j</i>             | Sector <i>i</i> Where Potential Impacts are Induced | Foreign Potential Impact |
| 1 Rice                         | Chemical fertilizer                     | Chemical fertilizer                                 | 0.136 (2.2%)             | Chemical fertilizer                      | Chemical fertilizer                                 | 0.125 (3.0%)             | Edible crops *                             | Edible crops *                                      | 11.535 (0.5%)            |
| 2 Wheat, barley and the like   | Chemical fertilizer                     | Chemical fertilizer                                 | 0.273 (4.6%)             | Chemical fertilizer                      | Chemical fertilizer                                 | 0.251 (4.7%)             | Wheat & barley *                           | Wheat & barley *                                    | 89.875 (2.3%)            |
| 3 Potatoes and sweet potatoes  | Chemical fertilizer                     | Chemical fertilizer                                 | 0.223 (6.0%)             | Chemical fertilizer                      | Chemical fertilizer                                 | 0.205 (5.8%)             | Seeds & seedlings                          | Seeds & seedlings                                   | 7.894 (0.7%)             |
| 4 Pulses                       | Chemical fertilizer                     | Chemical fertilizer                                 | 0.171 (3.2%)             | Chemical fertilizer                      | Chemical fertilizer                                 | 0.157 (4.3%)             | Pulses                                     | Pulses                                              | 109.643 (2.8%)           |
| 5 Vegetables                   | Chemical fertilizer                     | Chemical fertilizer                                 | 0.106 (2.5%)             | CM, CP & NG *                            | Private PG *                                        | 0.117 (1.1%)             | Seeds & seedlings                          | Seeds & seedlings                                   | 46.315 (12.3%)           |
| 6 Fruits                       | Chemical fertilizer                     | Chemical fertilizer                                 | 0.098 (2.9%)             | CM, CP & NG *                            | Private PG *                                        | 0.091 (1.2%)             | Edible crops *                             | Edible crops *                                      | 5.898 (0.6%)             |
| 7 Sugar crops                  | Chemical fertilizer                     | Chemical fertilizer                                 | 0.317 (7.6%)             | Chemical fertilizer                      | Chemical fertilizer                                 | 0.291 (6.0%)             | Seeds & seedlings                          | Seeds & seedlings                                   | 26.486 (0.7%)            |
| 8 Crops for beverages          | Chemical fertilizer                     | Chemical fertilizer                                 | 0.291 (2.3%)             | Chemical fertilizer                      | Chemical fertilizer                                 | 0.268 (5.8%)             | Edible crops *                             | Edible crops *                                      | 9.145 (0.5%)             |
| 9 Other edible crops           | Edible crops *                          | Edible crops *                                      | 0.966 (13.1%)            | Chemical fertilizer                      | Chemical fertilizer                                 | 0.123 (3.0%)             | Edible crops *                             | Edible crops *                                      | 862.093 (19.7%)          |
| 10 Crops for feed and foraging | Chemical fertilizer                     | Chemical fertilizer                                 | 0.181 (1.9%)             | Chemical fertilizer                      | Chemical fertilizer                                 | 0.166 (5.0%)             | Seeds & seedlings                          | Seeds & seedlings                                   | 61.012 (0.5%)            |
| 11 Seeds and seedlings         | Chemical fertilizer                     | Chemical fertilizer                                 | 0.107 (5.7%)             | Chemical fertilizer                      | Chemical fertilizer                                 | 0.098 (3.5%)             | Seeds & seedlings                          | Seeds & seedlings                                   | 523.737 (10.9%)          |
| 12 Flowers and plants          | CM, CP & NG *                           | CM, CP & NG *                                       | 0.201 (2.6%)             | CM, CP & NG *                            | Private PG *                                        | 0.266 (0.8%)             | Seeds & seedlings                          | Seeds & seedlings                                   | 47.766 (19.7%)           |

Table S4. Cont.

|                                               | GWP (t·CO <sub>2</sub> ·eq/million JPY) |                                                     |                          | DAP (kg·SO <sub>2</sub> ·eq/million JPY) |                                                     |                          | WSI (m <sup>3</sup> ·water·eq/million JPY) |                                                     |                          |
|-----------------------------------------------|-----------------------------------------|-----------------------------------------------------|--------------------------|------------------------------------------|-----------------------------------------------------|--------------------------|--------------------------------------------|-----------------------------------------------------|--------------------------|
|                                               | Imported Raw Material <i>j</i>          | Sector <i>i</i> Where Potential Impacts are Induced | Foreign Potential Impact | Imported Raw Material <i>j</i>           | Sector <i>i</i> Where Potential Impacts are Induced | Foreign Potential Impact | Imported Raw Material <i>j</i>             | Sector <i>i</i> Where Potential Impacts are Induced | Foreign Potential Impact |
| 13Other inedible crops                        | Chemical fertilizer                     | Chemical fertilizer                                 | 0.110 (2.5%)             | Chemical fertilizer                      | Chemical fertilizer                                 | 0.101 (3.2%)             | Edible crops *                             | Edible crops *                                      | 2.942 (2.5%)             |
| 14Dairy cattle farming                        | Crops for feed *                        | Crops for feed *                                    | 0.394 (3.8%)             | CM, CP & NG *                            | Private PG *                                        | 0.062 (1.5%)             | Crops for feed *                           | Crops for feed *                                    | 690.084 (23.4%)          |
| 15Hen eggs                                    | Edible crops *                          | Edible crops *                                      | 0.565 (9.5%)             | Feeds                                    | Feeds                                               | 0.109 (2.0%)             | Edible crops *                             | Edible crops *                                      | 504.225 (54.5%)          |
| 16Fowls and broilers                          | Edible crops *                          | Edible crops *                                      | 0.604 (8.2%)             | Feeds                                    | Feeds                                               | 0.116 (1.8%)             | Edible crops *                             | Edible crops *                                      | 538.887 (53.5%)          |
| 17Hogs                                        | Edible crops *                          | Edible crops *                                      | 0.502 (6.8%)             | Feeds                                    | Feeds                                               | 0.096 (1.8%)             | Edible crops *                             | Edible crops *                                      | 447.564 (41.8%)          |
| 18Beef cattle                                 | Edible crops *                          | Edible crops *                                      | 0.330 (2.5%)             | CM, CP & NG *                            | Private PG *                                        | 0.077 (1.6%)             | Crops for feed *                           | Crops for feed *                                    | 458.844 (18.4%)          |
| 19Other livestock                             | Edible crops *                          | Edible crops *                                      | 0.349 (8.0%)             | CM, CP & NG *                            | Private PG *                                        | 0.071 (1.7%)             | Edible crops *                             | Edible crops *                                      | 311.575 (29.0%)          |
| 20Veterinary service                          | CM, CP & NG *                           | CM, CP & NG *                                       | 0.035 (2.8%)             | CM, CP & NG *                            | Private PG *                                        | 0.047 (2.9%)             | Edible crops *                             | Edible crops *                                      | 10.441 (19.2%)           |
| Agricultural services                         |                                         |                                                     |                          |                                          |                                                     |                          |                                            |                                                     |                          |
| 21(except veterinary service)                 | CM, CP & NG *                           | CM, CP & NG *                                       | 0.083 (2.7%)             | CM, CP & NG *                            | Private PG *                                        | 0.109 (2.8%)             | Edible crops *                             | Edible crops *                                      | 30.255 (28.7%)           |
| 22Silviculture                                | CM, CP & NG *                           | CM, CP & NG *                                       | 0.018 (4.1%)             | CM, CP & NG *                            | Private PG *                                        | 0.024 (4.6%)             | Logs                                       | Silviculture                                        | 1.582 (0.0%)             |
| 23Logs                                        | CM, CP & NG *                           | CM, CP & NG *                                       | 0.070 (4.1%)             | CM, CP & NG *                            | Private PG *                                        | 0.092 (3.7%)             | CM, CP & NG *                              | Silviculture                                        | 1.177 (0.0%)             |
| 24Special forest products (including hunting) | CM, CP & NG *                           | CM, CP & NG *                                       | 0.159 (3.0%)             | CM, CP & NG *                            | Private PG *                                        | 0.209 (1.2%)             | Logs                                       | Silviculture                                        | 520.981 (35.4%)          |
| 25Marine fisheries                            | CM, CP & NG *                           | CM, CP & NG *                                       | 0.228 (2.4%)             | Frozen fish *                            | Marine fisheries                                    | 0.497 (0.3%)             | CM, CP & NG *                              | Silviculture                                        | 3.849 (22.3%)            |

Table S4. Cont.

|                                                 | GWP (t·CO <sub>2</sub> ·eq/million JPY) |                                                     |                          | DAP (kg·SO <sub>2</sub> ·eq/million JPY) |                                                     |                          | WSI (m <sup>3</sup> ·water·eq/million JPY) |                                                     |                          |
|-------------------------------------------------|-----------------------------------------|-----------------------------------------------------|--------------------------|------------------------------------------|-----------------------------------------------------|--------------------------|--------------------------------------------|-----------------------------------------------------|--------------------------|
|                                                 | Imported Raw Material <i>j</i>          | Sector <i>i</i> Where Potential Impacts are Induced | Foreign Potential Impact | Imported Raw Material <i>j</i>           | Sector <i>i</i> Where Potential Impacts are Induced | Foreign Potential Impact | Imported Raw Material <i>j</i>             | Sector <i>i</i> Where Potential Impacts are Induced | Foreign Potential Impact |
| 26 Marine culture                               | Frozen fish *                           | Marine fisheries                                    | 0.222 (4.8%)             | Frozen fish *                            | Marine fisheries                                    | 4.877 (7.0%)             | Edible crops *                             | Edible crops *                                      | 40.430 (46.9%)           |
| 27 Inland water fisheries and culture           | CM, CP & NG *                           | CM, CP & NG *                                       | 0.135 (2.7%)             | IW fisheries *                           | IW fisheries *                                      | 1.822 (3.2%)             | IW fisheries *                             | IW fisheries *                                      | 379.765 (3.7%)           |
| 28 Metallic ores                                | CM, CP & NG *                           | CM, CP & NG *                                       | 0.177 (2.3%)             | CM, CP & NG *                            | Private PG *                                        | 0.234 (1.8%)             | Logs                                       | Silviculture                                        | 28.837 (32.7%)           |
| 29 Materials for ceramics                       | CM, CP & NG *                           | CM, CP & NG *                                       | 0.210 (2.7%)             | CM, CP & NG *                            | Private PG *                                        | 0.277 (3.0%)             | CM, CP & NG *                              | Silviculture                                        | 3.544 (16.2%)            |
| 30 Gravel and quarrying                         | CM, CP & NG *                           | CM, CP & NG *                                       | 0.239 (4.3%)             | CM, CP & NG *                            | Private PG *                                        | 0.315 (4.6%)             | CM, CP & NG *                              | Silviculture                                        | 4.031 (18.5%)            |
| 31 Crushed stones                               | CM, CP & NG *                           | CM, CP & NG *                                       | 0.218 (4.0%)             | CM, CP & NG *                            | Private PG *                                        | 0.288 (4.3%)             | CM, CP & NG *                              | Silviculture                                        | 3.677 (11.3%)            |
| 32 Other non-metallic ores                      | CM, CP & NG *                           | CM, CP & NG *                                       | 0.298 (3.1%)             | CM, CP & NG *                            | Private PG *                                        | 0.394 (1.7%)             | Logs                                       | Silviculture                                        | 24.247 (27.9%)           |
| 33 Coal mining, crude petroleum and natural gas | CM, CP & NG *                           | CM, CP & NG *                                       | 0.094 (1.2%)             | CM, CP & NG *                            | Private PG *                                        | 0.123 (1.6%)             | Logs                                       | Silviculture                                        | 23.558 (33.0%)           |
| 34 Slaughtering and meat processing             | Edible crops *                          | Edible crops *                                      | 0.372 (4.4%)             | CM, CP & NG *                            | Private PG *                                        | 0.078 (1.6%)             | Edible crops *                             | Edible crops *                                      | 331.908 (23.4%)          |
| 35 Processed meat products                      | Slaughtering *                          | Beef cattle                                         | 0.430 (9.0%)             | Slaughtering *                           | Electricity                                         | 0.141 (2.9%)             | Slaughtering *                             | Crops for feed *                                    | 121.451 (20.2%)          |
| 36 Bottled or canned meat products              | Slaughtering *                          | Beef cattle                                         | 0.099 (2.9%)             | Frozen fish *                            | Marine fisheries                                    | 0.157 (2.8%)             | Slaughtering *                             | Crops for feed *                                    | 28.018 (11.3%)           |
| 37 Dairy farm products                          | Crops for feed *                        | Crops for feed *                                    | 0.157 (2.4%)             | CM, CP & NG *                            | Private PG *                                        | 0.099 (1.4%)             | Crops for feed *                           | Crops for feed *                                    | 274.570 (21.9%)          |
| 38 Frozen fish and shellfish                    | Marine fisheries                        | Marine fisheries                                    | 0.640 (11.4%)            | Marine fisheries                         | Marine fisheries                                    | 14.088 (16.2%)           | CM, CP & NG *                              | Silviculture                                        | 2.049 (10.0%)            |
| 39 Salted, dried or smoked seafood              | Frozen fish *                           | Marine fisheries                                    | 0.464 (10.9%)            | Frozen fish *                            | Marine fisheries                                    | 10.215 (18.9%)           | IW fisheries *                             | IW fisheries *                                      | 30.298 (24.6%)           |

Table S4. Cont.

|                                                                     | GWP (t·CO <sub>2</sub> ·eq/million JPY) |                                                     |                          | DAP (kg·SO <sub>2</sub> ·eq/million JPY) |                                                     |                          | WSI (m <sup>3</sup> ·water·eq/million JPY) |                                                     |                          |
|---------------------------------------------------------------------|-----------------------------------------|-----------------------------------------------------|--------------------------|------------------------------------------|-----------------------------------------------------|--------------------------|--------------------------------------------|-----------------------------------------------------|--------------------------|
|                                                                     | Imported Raw Material <i>j</i>          | Sector <i>i</i> Where Potential Impacts are Induced | Foreign Potential Impact | Imported Raw Material <i>j</i>           | Sector <i>i</i> Where Potential Impacts are Induced | Foreign Potential Impact | Imported Raw Material <i>j</i>             | Sector <i>i</i> Where Potential Impacts are Induced | Foreign Potential Impact |
| 40 Bottled or canned seafood                                        | Frozen fish *                           | Marine fisheries                                    | 0.293 (6.8%)             | Frozen fish *                            | Marine fisheries                                    | 6.451 (18.0%)            | Edible crops *                             | Edible crops *                                      | 16.375 (24.1%)           |
| 41 Fish paste                                                       | Frozen fish *                           | Marine fisheries                                    | 0.350 (9.8%)             | Frozen fish *                            | Marine fisheries                                    | 7.699 (30.3%)            | Edible crops *                             | Edible crops *                                      | 29.430 (22.7%)           |
| 42 Other processed seafood                                          | Frozen fish *                           | Marine fisheries                                    | 0.203 (6.0%)             | Frozen fish *                            | Marine fisheries                                    | 4.465 (12.9%)            | IW fisheries *                             | IW fisheries *                                      | 24.958 (20.6%)           |
| 43 Grain milling<br>Flour and other                                 | Chemical fertilizer                     | Chemical fertilizer                                 | 0.096 (2.0%)             | CM, CP & NG *                            | Private PG *                                        | 0.091 (2.3%)             | Wheat & barley *                           | Wheat & barley *                                    | 14.805 (0.9%)            |
| 44 grain milled products                                            | Wheat & barley *                        | Wheat & barley *                                    | 0.613 (12.0%)            | Wheat & barley *                         | Chemical fertilizer                                 | 0.247 (3.0%)             | Wheat & barley *                           | Wheat & barley *                                    | 968.946 (45.2%)          |
| 45 Noodles                                                          | Wheat & barley *                        | Wheat & barley *                                    | 0.110 (3.1%)             | CM, CP & NG *                            | Private PG *                                        | 0.103 (1.1%)             | Wheat & barley *                           | Wheat & barley *                                    | 174.245 (35.4%)          |
| 46 Bread                                                            | Wheat & barley *                        | Wheat & barley *                                    | 0.078 (2.7%)             | CM, CP & NG *                            | Private PG *                                        | 0.074 (1.6%)             | Wheat & barley *                           | Wheat & barley *                                    | 123.949 (28.3%)          |
| 47 Confectionery                                                    | CM, CP & NG *                           | CM, CP & NG *                                       | 0.060 (2.0%)             | CM, CP & NG *                            | Private PG *                                        | 0.079 (1.4%)             | Edible crops *                             | Edible crops *                                      | 36.281 (11.1%)           |
| 48 Bottled or canned vegetables and fruits                          | CM, CP & NG *                           | CM, CP & NG *                                       | 0.075 (2.0%)             | Fruits                                   | Fruits                                              | 0.134 (1.6%)             | Pulses                                     | Pulses                                              | 53.454 (17.1%)           |
| 49 Preserved agricultural foodstuffs (other than bottled or canned) | CM, CP & NG *                           | CM, CP & NG *                                       | 0.061 (2.3%)             | CM, CP & NG *                            | Private PG *                                        | 0.081 (1.4%)             | Seeds & seedlings                          | Seeds & seedlings                                   | 9.374 (6.4%)             |
| 50 Sugar                                                            | CM, CP & NG *                           | CM, CP & NG *                                       | 0.142 (1.8%)             | CM, CP & NG *                            | Private PG *                                        | 0.188 (1.5%)             | Sugar                                      | Sugar crops                                         | 28.232 (2.2%)            |
| 51 Starch                                                           | Edible crops *                          | Edible crops *                                      | 1.876 (27.0%)            | Edible crops *                           | Private PG *                                        | 0.236 (2.5%)             | Edible crops *                             | Edible crops *                                      | 1673.69 (87.9%)          |

Table S4. Cont.

|                                         | GWP (t·CO <sub>2</sub> ·eq/million JPY) |                                                     |                          | DAP (kg·SO <sub>2</sub> ·eq/million JPY) |                                                     |                          | WSI (m <sup>3</sup> ·water·eq/million JPY) |                                                     |                          |
|-----------------------------------------|-----------------------------------------|-----------------------------------------------------|--------------------------|------------------------------------------|-----------------------------------------------------|--------------------------|--------------------------------------------|-----------------------------------------------------|--------------------------|
|                                         | Imported Raw Material <i>j</i>          | Sector <i>i</i> Where Potential Impacts are Induced | Foreign Potential Impact | Imported Raw Material <i>j</i>           | Sector <i>i</i> Where Potential Impacts are Induced | Foreign Potential Impact | Imported Raw Material <i>j</i>             | Sector <i>i</i> Where Potential Impacts are Induced | Foreign Potential Impact |
| 52 Dextrose, syrup and isomerized sugar | Edible crops *                          | Edible crops *                                      | 0.841 (9.4%)             | Starch                                   | Starch                                              | 0.213 (1.3%)             | Edible crops *                             | Edible crops *                                      | 750.484 (76.2%)          |
| 53 Vegetable oils and meal              | Edible crops *                          | Edible crops *                                      | 0.939 (15.9%)            | Edible crops *                           | Private PG *                                        | 0.118 (1.7%)             | Edible crops *                             | Edible crops *                                      | 837.475 (45.0%)          |
| 54 Animal oils and fats                 | Slaughtering *                          | Beef cattle                                         | 0.225 (3.0%)             | Marine fisheries                         | Marine fisheries                                    | 0.729 (4.0%)             | Slaughtering *                             | Crops for feed *                                    | 63.599 (15.9%)           |
| 55 Condiments and seasonings            | Edible crops *                          | Edible crops *                                      | 0.083 (2.6%)             | Salt                                     | Salt                                                | 0.165 (2.4%)             | Edible crops *                             | Edible crops *                                      | 74.138 (26.8%)           |
| 56 Prepared frozen foods                | Slaughtering *                          | Beef cattle                                         | 0.105 (2.6%)             | Frozen fish *                            | Marine fisheries                                    | 1.574 (14.3%)            | Edible crops *                             | Edible crops *                                      | 33.996 (11.1%)           |
| 57 Retort foods                         | CM, CP & NG *                           | CM, CP & NG *                                       | 0.071 (1.9%)             | Frozen fish *                            | Marine fisheries                                    | 0.282 (3.1%)             | Edible crops *                             | Edible crops *                                      | 27.944 (11.2%)           |
| 58 Dishes, sushi and lunch boxes        | Slaughtering *                          | Beef cattle                                         | 0.068 (2.0%)             | Frozen fish *                            | Marine fisheries                                    | 0.755 (8.8%)             | Edible crops *                             | Edible crops *                                      | 37.663 (9.1%)            |
| 59 School lunch (public)                | CM, CP & NG *                           | CM, CP & NG *                                       | 0.055 (1.9%)             | Frozen fish *                            | Marine fisheries                                    | 0.633 (11.0%)            | Crops for feed *                           | Crops for feed *                                    | 28.355 (8.1%)            |
| 60 School lunch (private)               | CM, CP & NG *                           | CM, CP & NG *                                       | 0.051 (1.8%)             | Frozen fish *                            | Marine fisheries                                    | 0.734 (12.2%)            | Edible crops *                             | Edible crops *                                      | 31.372 (8.5%)            |
| 61 Other foods                          | Pulses                                  | Pulses                                              | 0.124 (3.1%)             | CM, CP & NG *                            | Private PG *                                        | 0.108 (1.3%)             | Pulses                                     | Pulses                                              | 174.646 (30.1%)          |
| 62 Refined sake                         | CM, CP & NG *                           | CM, CP & NG *                                       | 0.053 (2.0%)             | CM, CP & NG *                            | Private PG *                                        | 0.070 (1.9%)             | Wood chips                                 | Silviculture                                        | 4.633 (1.1%)             |
| 63 Beer                                 | CM, CP & NG *                           | CM, CP & NG *                                       | 0.036 (2.2%)             | CM, CP & NG *                            | Private PG *                                        | 0.047 (1.9%)             | Edible crops *                             | Edible crops *                                      | 9.313 (17.0%)            |
| 64 Whiskey and brandy                   | CM, CP & NG *                           | CM, CP & NG *                                       | 0.047 (2.5%)             | CM, CP & NG *                            | Private PG *                                        | 0.062 (1.6%)             | Wood chips                                 | Silviculture                                        | 3.712 (10.6%)            |
| 65 Other liquors                        | CM, CP & NG *                           | CM, CP & NG *                                       | 0.048 (2.1%)             | CM, CP & NG *                            | Private PG *                                        | 0.064 (1.6%)             | Edible crops *                             | Edible crops *                                      | 14.629 (11.7%)           |
| 66 Tea and roasted coffee               | Crops for beverages                     | Crops for beverages                                 | 1.073 (22.8%)            | Crops for beverages                      | Electricity                                         | 0.138 (3.3%)             | Crops for beverages                        | Crops for beverages                                 | 219.019 (46.9%)          |
| 67 Soft drinks                          | Crops for beverages                     | Crops for beverages                                 | 0.074 (2.6%)             | CM, CP & NG *                            | Private PG *                                        | 0.078 (1.6%)             | Crops for beverages                        | Crops for beverages                                 | 15.027 (10.6%)           |
| 68 Manufactured ice                     | CM, CP & NG *                           | CM, CP & NG *                                       | 0.113 (2.4%)             | CM, CP & NG *                            | Private PG *                                        | 0.150 (2.4%)             | Wood chips                                 | Silviculture                                        | 2.391 (2.1%)             |

Table S4. Cont.

|                                                                                              | GWP (t·CO <sub>2</sub> ·eq/million JPY) |                                                     |                          | DAP (kg·SO <sub>2</sub> ·eq/million JPY) |                                                     |                          | WSI (m <sup>3</sup> ·water·eq/million JPY) |                                                     |                          |
|----------------------------------------------------------------------------------------------|-----------------------------------------|-----------------------------------------------------|--------------------------|------------------------------------------|-----------------------------------------------------|--------------------------|--------------------------------------------|-----------------------------------------------------|--------------------------|
|                                                                                              | Imported Raw Material <i>j</i>          | Sector <i>i</i> Where Potential Impacts are Induced | Foreign Potential Impact | Imported Raw Material <i>j</i>           | Sector <i>i</i> Where Potential Impacts are Induced | Foreign Potential Impact | Imported Raw Material <i>j</i>             | Sector <i>i</i> Where Potential Impacts are Induced | Foreign Potential Impact |
| 69Feeds                                                                                      | Edible crops *                          | Edible crops *                                      | 1.207 (26.0%)            | Edible crops *                           | Private PG *                                        | 0.152 (2.3%)             | Edible crops *                             | Edible crops *                                      | 1071.92 (64.2%)          |
| 70Organic fertilizers                                                                        | Edible crops *                          | Edible crops *                                      | 0.217 (5.8%)             | Frozen fish *                            | Marine fisheries                                    | 0.379 (6.4%)             | Edible crops *                             | Edible crops *                                      | 193.878 (18.0%)          |
| 71Tobacco                                                                                    | Inedible crops *                        | Inedible crops *                                    | 0.108 (13.9%)            | Inedible crops *                         | Inedible crops *                                    | 0.043 (4.0%)             | Wood chips                                 | Silviculture                                        | 3.515 (20.4%)            |
| 72Fiber yarns<br>Cotton and staple fiber                                                     | Inedible crops *                        | Inedible crops *                                    | 0.243 (4.1%)             | Synthetic fibers                         | Synthetic fibers                                    | 0.262 (2.5%)             | Inedible crops *                           | Inedible crops *                                    | 6.494 (8.6%)             |
| 73fabrics (including<br>fabrics of synthetic<br>spun fibers)                                 | CM, CP & NG *                           | CM, CP & NG *                                       | 0.119 (1.9%)             | Synthetic fibers                         | Synthetic fibers                                    | 0.177 (1.5%)             | Edible crops *                             | Edible crops *                                      | 4.501 (8.1%)             |
| 74Silk and artificial silk<br>fabrics (including<br>fabrics of synthetic<br>filament fibers) | Synthetic fibers                        | Synthetic fibers                                    | 0.134 (2.0%)             | Synthetic fibers                         | Synthetic fibers                                    | 0.430 (3.3%)             | Wood chips                                 | Silviculture                                        | 6.070 (10.1%)            |
| 75Woolen fabrics, hemp<br>fabrics and other<br>fabrics                                       | Synthetic dyes                          | Synthetic dyes                                      | 0.143 (2.3%)             | Synthetic dyes                           | Private PG *                                        | 0.181 (1.7%)             | Wood chips                                 | Silviculture                                        | 3.996 (7.2%)             |
| 76Knitting fabrics<br>Yarn and fabric dyeing                                                 | Synthetic fibers                        | Synthetic fibers                                    | 0.098 (2.0%)             | Synthetic fibers                         | Synthetic fibers                                    | 0.314 (3.5%)             | Wood chips                                 | Silviculture                                        | 2.586 (5.6%)             |
| 77and finishing<br>(processing on<br>commission only)                                        | Synthetic dyes                          | Synthetic dyes                                      | 0.397 (4.3%)             | Synthetic dyes                           | Private PG *                                        | 0.500 (3.3%)             | Synthetic dyes                             | Industrial WS *                                     | 3.407 (4.9%)             |
| 78Ropes and nets                                                                             | Synthetic fibers                        | Synthetic fibers                                    | 0.166 (3.1%)             | Synthetic fibers                         | Synthetic fibers                                    | 0.533 (5.0%)             | Synthetic fibers                           | Industrial WS *                                     | 3.315 (6.1%)             |
| 79Carpets and floor mats                                                                     | CM, CP & NG *                           | CM, CP & NG *                                       | 0.114 (2.0%)             | Synthetic fibers                         | Synthetic fibers                                    | 0.326 (3.1%)             | Wood chips                                 | Silviculture                                        | 3.851 (6.0%)             |
| 80Fabricated textiles for<br>medical use                                                     | Inedible crops *                        | Inedible crops *                                    | 0.103 (2.7%)             | Paper                                    | Paper                                               | 0.099 (1.4%)             | Wood chips                                 | Silviculture                                        | 26.096 (29.8%)           |



Table S4. Cont.

|    | GWP (t·CO <sub>2</sub> ·eq/million JPY)        |                                                     |                            | DAP (kg·SO <sub>2</sub> ·eq/million JPY) |                                                     |                          | WSI (m <sup>3</sup> ·water·eq/million JPY) |                                                     |                          |
|----|------------------------------------------------|-----------------------------------------------------|----------------------------|------------------------------------------|-----------------------------------------------------|--------------------------|--------------------------------------------|-----------------------------------------------------|--------------------------|
|    | Imported Raw Material <i>j</i>                 | Sector <i>i</i> Where Potential Impacts are Induced | Foreign Potential Impact   | Imported Raw Material <i>j</i>           | Sector <i>i</i> Where Potential Impacts are Induced | Foreign Potential Impact | Imported Raw Material <i>j</i>             | Sector <i>i</i> Where Potential Impacts are Induced | Foreign Potential Impact |
| 81 | Other fabricated textile products              | CM, CP & NG *                                       | CM, CP & NG * 0.113 (2.0%) | Synthetic fibers                         | Synthetic fibers                                    | 0.161 (1.7%)             | Wood chips                                 | Silviculture                                        | 8.332 (13.1%)            |
| 82 | Woven fabric apparel                           | CM, CP & NG *                                       | CM, CP & NG * 0.060 (1.8%) | CM, CP & NG *                            | Private PG *                                        | 0.079 (1.3%)             | Wood chips                                 | Silviculture                                        | 3.474 (10.4%)            |
| 83 | Knitted apparel                                | CM, CP & NG *                                       | CM, CP & NG * 0.082 (1.9%) | Synthetic fibers                         | Synthetic fibers                                    | 0.229 (2.8%)             | Wood chips                                 | Silviculture                                        | 3.017 (7.8%)             |
| 84 | Other wearing apparel and clothing accessories | CM, CP & NG *                                       | CM, CP & NG * 0.083 (2.0%) | CM, CP & NG *                            | Private PG *                                        | 0.109 (1.3%)             | Wood chips                                 | Silviculture                                        | 4.466 (8.5%)             |
| 85 | Bedding                                        | C&SF fabrics *                                      | Electricity 0.107 (3.3%)   | C&SF fabrics *                           | Private PG *                                        | 0.139 (2.9%)             | Slaughtering *                             | Crops for feed *                                    | 23.870 (16.4%)           |
| 86 | Other ready-made textile products              | CM, CP & NG *                                       | CM, CP & NG * 0.065 (1.9%) | Synthetic fibers                         | Synthetic fibers                                    | 0.120 (1.9%)             | Wood chips                                 | Silviculture                                        | 2.873 (8.0%)             |
| 87 | Timber                                         | Logs                                                | Logs 0.086 (4.8%)          | Logs                                     | Logs                                                | 0.185 (7.0%)             | Logs                                       | Silviculture                                        | 3435.01 (45.9%)          |
| 88 | Plywood                                        | CM, CP & NG *                                       | CM, CP & NG * 0.078 (2.6%) | CM, CP & NG *                            | Private PG *                                        | 0.103 (2.1%)             | Logs                                       | Silviculture                                        | 973.847 (39.8%)          |
| 89 | Wood chips                                     | Logs                                                | Logs 0.081 (3.7%)          | Logs                                     | Logs                                                | 0.173 (6.0%)             | Logs                                       | Silviculture                                        | 3206.76 (44.6%)          |
| 90 | Other wooden products                          | CM, CP & NG *                                       | CM, CP & NG * 0.057 (2.5%) | CM, CP & NG *                            | Private PG *                                        | 0.075 (2.1%)             | Logs                                       | Silviculture                                        | 274.794 (27.1%)          |
| 91 | Wooden furniture and fixtures                  | CM, CP & NG *                                       | CM, CP & NG * 0.059 (2.4%) | CM, CP & NG *                            | Private PG *                                        | 0.078 (1.8%)             | Logs                                       | Silviculture                                        | 130.132 (27.8%)          |
| 92 | Wooden fixtures                                | CM, CP & NG *                                       | CM, CP & NG * 0.058 (2.3%) | CM, CP & NG *                            | Private PG *                                        | 0.077 (1.6%)             | Logs                                       | Silviculture                                        | 190.886 (28.3%)          |
| 93 | Metallic furniture and fixture                 | CM, CP & NG *                                       | CM, CP & NG * 0.076 (1.7%) | CM, CP & NG *                            | Private PG *                                        | 0.100 (1.8%)             | Logs                                       | Silviculture                                        | 12.376 (19.1%)           |
| 94 | Pulp                                           | CM, CP & NG *                                       | CM, CP & NG * 0.222 (1.2%) | CM, CP & NG *                            | Private PG *                                        | 0.293 (0.9%)             | Wood chips                                 | Silviculture                                        | 2279.47 (71.8%)          |
| 95 | Paper                                          | Pulp                                                | Pulp 0.564 (3.8%)          | Pulp                                     | Pulp                                                | 0.962 (1.8%)             | Wood chips                                 | Silviculture                                        | 488.081 (52.1%)          |
| 96 | Paperboard                                     | Pulp                                                | Pulp 0.308 (3.0%)          | Pulp                                     | Pulp                                                | 0.525 (1.7%)             | Wood chips                                 | Silviculture                                        | 266.417 (45.7%)          |

Table S4. *Cont.*

|     | GWP (t·CO <sub>2</sub> ·eq/million JPY)        |                                                     |                          | DAP (kg·SO <sub>2</sub> ·eq/million JPY) |                                                     |                          | WSI (m <sup>3</sup> ·water·eq/million JPY) |                                                     |                          |                 |
|-----|------------------------------------------------|-----------------------------------------------------|--------------------------|------------------------------------------|-----------------------------------------------------|--------------------------|--------------------------------------------|-----------------------------------------------------|--------------------------|-----------------|
|     | Imported Raw Material <i>j</i>                 | Sector <i>i</i> Where Potential Impacts are Induced | Foreign Potential Impact | Imported Raw Material <i>j</i>           | Sector <i>i</i> Where Potential Impacts are Induced | Foreign Potential Impact | Imported Raw Material <i>j</i>             | Sector <i>i</i> Where Potential Impacts are Induced | Foreign Potential Impact |                 |
| 97  | Corrugated cardboard                           | Pulp                                                | Pulp                     | 0.155 (2.5%)                             | Pulp                                                | Pulp                     | 0.265 (1.5%)                               | Wood chips                                          | Silviculture             | 134.549 (41.7%) |
| 98  | Coated paper and building paper                | Pulp                                                | Pulp                     | 0.109 (2.0%)                             | Paper                                               | Paper                    | 0.303 (2.1%)                               | Wood chips                                          | Silviculture             | 95.070 (40.7%)  |
| 99  | Corrugated cardboard boxes                     | CM, CP & NG *                                       | CM, CP & NG *            | 0.070 (2.1%)                             | Pulp                                                | Pulp                     | 0.108 (1.2%)                               | Wood chips                                          | Silviculture             | 54.832 (39.6%)  |
| 100 | Other paper containers                         | Pulp                                                | Pulp                     | 0.086 (2.1%)                             | Paper                                               | Paper                    | 0.198 (1.8%)                               | Wood chips                                          | Silviculture             | 74.759 (42.2%)  |
| 101 | Paper textile for medical use                  | CM, CP & NG *                                       | CM, CP & NG *            | 0.106 (2.2%)                             | Paper                                               | Paper                    | 0.219 (2.0%)                               | Wood chips                                          | Silviculture             | 68.638 (43.1%)  |
| 102 | Other pulp, paper and processed paper products | Pulp                                                | Pulp                     | 0.086 (2.1%)                             | Paper                                               | Paper                    | 0.222 (1.9%)                               | Wood chips                                          | Silviculture             | 142.753 (54.9%) |
| 103 | Printing, plate making and book binding        | Pulp                                                | Pulp                     | 0.061 (2.0%)                             | Paper                                               | Paper                    | 0.192 (2.5%)                               | Wood chips                                          | Silviculture             | 52.984 (44.0%)  |
| 104 | Chemical fertilizer                            | Chemical fertilizer                                 | Chemical fertilizer      | 0.580 (3.3%)                             | CM, CP & NG *                                       | Private PG *             | 0.587 (2.9%)                               | CM, CP & NG *                                       | Silviculture             | 7.500 (11.3%)   |
| 105 | Industrial soda chemicals                      | CM, CP & NG *                                       | CM, CP & NG *            | 0.273 (1.4%)                             | Salt                                                | Salt                     | 1.316 (2.9%)                               | CM, CP & NG *                                       | Silviculture             | 4.607 (8.7%)    |
| 106 | Inorganic pigment                              | CM, CP & NG *                                       | CM, CP & NG *            | 0.201 (2.3%)                             | Metallic ores                                       | Private PG *             | 0.414 (2.4%)                               | Metallic ores                                       | Silviculture             | 4.594 (5.6%)    |
| 107 | Compressed gas and liquefied gas               | CM, CP & NG *                                       | CM, CP & NG *            | 0.236 (2.2%)                             | CM, CP & NG *                                       | Private PG *             | 0.311 (2.2%)                               | CM, CP & NG *                                       | Silviculture             | 3.979 (8.5%)    |
| 108 | Salt                                           | Salt                                                | Salt                     | 0.273 (2.2%)                             | Salt                                                | Salt                     | 1.334 (2.6%)                               | Wood chips                                          | Silviculture             | 14.048 (24.3%)  |
| 109 | Other industrial inorganic chemicals           | Industrial IC *                                     | Industrial IC *          | 0.201 (1.6%)                             | NM ores *                                           | NM ores *                | 0.511 (2.3%)                               | Metallic ores                                       | Silviculture             | 3.211 (4.7%)    |

Table S4. Cont.

|                                                              | GWP (t·CO <sub>2</sub> ·eq/million JPY) |                                                     |                          | DAP (kg·SO <sub>2</sub> ·eq/million JPY) |                                                     |                          | WSI (m <sup>3</sup> ·water·eq/million JPY) |                                                     |                          |
|--------------------------------------------------------------|-----------------------------------------|-----------------------------------------------------|--------------------------|------------------------------------------|-----------------------------------------------------|--------------------------|--------------------------------------------|-----------------------------------------------------|--------------------------|
|                                                              | Imported Raw Material <i>j</i>          | Sector <i>i</i> Where Potential Impacts are Induced | Foreign Potential Impact | Imported Raw Material <i>j</i>           | Sector <i>i</i> Where Potential Impacts are Induced | Foreign Potential Impact | Imported Raw Material <i>j</i>             | Sector <i>i</i> Where Potential Impacts are Induced | Foreign Potential Impact |
| 110 Petrochemical basic products                             | CM, CP & NG *                           | CM, CP & NG *                                       | 1.474 (15.3%)            | CM, CP & NG *                            | Private PG *                                        | 1.945 (13.4%)            | CM, CP & NG *                              | Silviculture                                        | 24.855 (42.3%)           |
| 111 Petrochemical aromatic products (except synthetic resin) | CM, CP & NG *                           | CM, CP & NG *                                       | 1.230 (14.9%)            | CM, CP & NG *                            | Private PG *                                        | 1.623 (12.7%)            | CM, CP & NG *                              | Silviculture                                        | 20.739 (37.7%)           |
| 112 Aliphatic intermediates                                  | CM, CP & NG *                           | CM, CP & NG *                                       | 0.773 (5.3%)             | CM, CP & NG *                            | Private PG *                                        | 1.019 (4.3%)             | CM, CP & NG *                              | Silviculture                                        | 13.028 (10.9%)           |
| 113 Cyclic intermediates                                     | CM, CP & NG *                           | CM, CP & NG *                                       | 0.689 (6.6%)             | CM, CP & NG *                            | Private PG *                                        | 0.909 (6.0%)             | CM, CP & NG *                              | Silviculture                                        | 11.619 (13.2%)           |
| 114 Synthetic rubber                                         | CM, CP & NG *                           | CM, CP & NG *                                       | 0.547 (3.1%)             | CM, CP & NG *                            | Private PG *                                        | 0.722 (3.0%)             | CM, CP & NG *                              | Silviculture                                        | 9.223 (13.7%)            |
| 115 Methane derivatives                                      | CM, CP & NG *                           | CM, CP & NG *                                       | 0.356 (2.4%)             | Methane derivatives                      | Methane derivatives                                 | 0.538 (1.9%)             | CM, CP & NG *                              | Silviculture                                        | 5.995 (7.3%)             |
| 116 Oil and fat industrial chemicals                         | Animal oils & fats                      | Animal oils & fats                                  | 0.149 (2.7%)             | Animal oils & fats                       | Animal oils & fats                                  | 0.472 (5.1%)             | Edible crops *                             | Edible crops *                                      | 71.260 (25.1%)           |
| 117 Plasticizers                                             | Cyclic intermediates                    | Cyclic intermediates                                | 0.273 (2.6%)             | CM, CP & NG *                            | Private PG *                                        | 0.354 (1.8%)             | Cyclic intermediates                       | Industrial WS *                                     | 4.894 (6.1%)             |
| 118 Synthetic dyes                                           | Cyclic intermediates                    | Cyclic intermediates                                | 0.492 (3.5%)             | Cyclic intermediates                     | Private PG *                                        | 0.591 (2.8%)             | Cyclic intermediates                       | Industrial WS *                                     | 8.824 (8.1%)             |
| 119 Other industrial organic chemicals                       | CM, CP & NG *                           | CM, CP & NG *                                       | 0.338 (3.7%)             | CM, CP & NG *                            | Private PG *                                        | 0.446 (3.2%)             | Edible crops *                             | Edible crops *                                      | 5.705 (6.7%)             |
| 120 Thermo-setting resins                                    | Cyclic intermediates                    | Cyclic intermediates                                | 0.540 (6.6%)             | Cyclic intermediates                     | Private PG *                                        | 0.647 (4.9%)             | Cyclic intermediates                       | Industrial WS *                                     | 9.671 (11.8%)            |
| 121 Thermoplastics resins                                    | CM, CP & NG *                           | CM, CP & NG *                                       | 0.726 (8.4%)             | CM, CP & NG *                            | Private PG *                                        | 0.958 (6.9%)             | CM, CP & NG *                              | Silviculture                                        | 12.237 (15.7%)           |
| 122 High function resins                                     | Cyclic intermediates                    | Cyclic intermediates                                | 0.626 (7.8%)             | Cyclic intermediates                     | Private PG *                                        | 0.751 (5.8%)             | Cyclic intermediates                       | Industrial WS *                                     | 11.211 (13.5%)           |

Table S4. Cont.

|                                                      | GWP (t·CO <sub>2</sub> ·eq/million JPY) |                                                     |                          | DAP (kg·SO <sub>2</sub> ·eq/million JPY) |                                                     |                          | WSI (m <sup>3</sup> ·water·eq/million JPY) |                                                     |                          |
|------------------------------------------------------|-----------------------------------------|-----------------------------------------------------|--------------------------|------------------------------------------|-----------------------------------------------------|--------------------------|--------------------------------------------|-----------------------------------------------------|--------------------------|
|                                                      | Imported Raw Material <i>j</i>          | Sector <i>i</i> Where Potential Impacts are Induced | Foreign Potential Impact | Imported Raw Material <i>j</i>           | Sector <i>i</i> Where Potential Impacts are Induced | Foreign Potential Impact | Imported Raw Material <i>j</i>             | Sector <i>i</i> Where Potential Impacts are Induced | Foreign Potential Impact |
| 123Other resins                                      | Cyclic intermediates                    | Cyclic intermediates                                | 0.438 (4.7%)             | Cyclic intermediates                     | Private PG *                                        | 0.526 (3.9%)             | Wood chips                                 | Silviculture                                        | 16.984 (11.3%)           |
| 124Rayon and acetate                                 | CM, CP & NG *                           | CM, CP & NG *                                       | 0.183 (1.1%)             | Pulp                                     | Pulp                                                | 0.248 (1.4%)             | Wood chips                                 | Silviculture                                        | 126.331 (43.0%)          |
| 125Synthetic fibers                                  | Cyclic intermediates                    | Cyclic intermediates                                | 0.362 (3.1%)             | Cyclic intermediates                     | Private PG *                                        | 0.434 (1.7%)             | Cyclic intermediates                       | Industrial WS *                                     | 6.489 (5.9%)             |
| 126Medicaments<br>Soap, synthetic<br>detergents      | CM, CP & NG *                           | CM, CP & NG *                                       | 0.066 (2.4%)             | CM, CP & NG *                            | Private PG *                                        | 0.087 (1.7%)             | Edible crops *                             | Edible crops *                                      | 5.373 (10.6%)            |
| 127and surface active<br>agents<br>Cosmetics, toilet | CM, CP & NG *                           | CM, CP & NG *                                       | 0.129 (2.4%)             | CM, CP & NG *                            | Private PG *                                        | 0.170 (1.6%)             | Wood chips                                 | Silviculture                                        | 8.699 (11.9%)            |
| 128preparations<br>and dentifrices                   | CM, CP & NG *                           | CM, CP & NG *                                       | 0.083 (2.1%)             | CM, CP & NG *                            | Private PG *                                        | 0.109 (1.6%)             | Wood chips                                 | Silviculture                                        | 11.098 (21.9%)           |
| 129Paint and varnishes                               | CM, CP & NG *                           | CM, CP & NG *                                       | 0.210 (3.5%)             | CM, CP & NG *                            | Private PG *                                        | 0.277 (2.9%)             | CM, CP & NG *                              | Silviculture                                        | 3.545 (5.1%)             |
| 130Printing ink                                      | CM, CP & NG *                           | CM, CP & NG *                                       | 0.192 (3.6%)             | CM, CP & NG *                            | Private PG *                                        | 0.253 (3.0%)             | Edible crops *                             | Edible crops *                                      | 13.066 (14.2%)           |
| 131Photographic<br>sensitive materials               | Industrial IC *                         | Industrial IC *                                     | 0.158 (2.7%)             | Industrial IC *                          | Industrial IC *                                     | 0.243 (1.6%)             | Wood chips                                 | Silviculture                                        | 20.507 (30.1%)           |
| 132Agricultural<br>chemicals                         | CM, CP & NG *                           | CM, CP & NG *                                       | 0.118 (1.6%)             | CM, CP & NG *                            | Private PG *                                        | 0.156 (1.2%)             | Wood chips                                 | Silviculture                                        | 3.914 (5.2%)             |
| 133Gelatin and<br>adhesives                          | CM, CP & NG *                           | CM, CP & NG *                                       | 0.186 (3.1%)             | CM, CP & NG *                            | Private PG *                                        | 0.245 (2.2%)             | Logs                                       | Silviculture                                        | 4.307 (5.8%)             |
| 134Other final<br>chemical products                  | CM, CP & NG *                           | CM, CP & NG *                                       | 0.180 (2.6%)             | Final CP *                               | Final CP *                                          | 0.286 (2.0%)             | Edible crops *                             | Edible crops *                                      | 7.758 (10.9%)            |

Table S4. *Cont.*

|                                                 | GWP (t·CO <sub>2</sub> ·eq/million JPY) |                                                     |                          | DAP (kg·SO <sub>2</sub> ·eq/million JPY) |                                                     |                          | WSI (m <sup>3</sup> ·water·eq/million JPY) |                                                     |                          |
|-------------------------------------------------|-----------------------------------------|-----------------------------------------------------|--------------------------|------------------------------------------|-----------------------------------------------------|--------------------------|--------------------------------------------|-----------------------------------------------------|--------------------------|
|                                                 | Imported Raw Material <i>j</i>          | Sector <i>i</i> Where Potential Impacts are Induced | Foreign Potential Impact | Imported Raw Material <i>j</i>           | Sector <i>i</i> Where Potential Impacts are Induced | Foreign Potential Impact | Imported Raw Material <i>j</i>             | Sector <i>i</i> Where Potential Impacts are Induced | Foreign Potential Impact |
| Petroleum refinery products (including greases) | CM, CP & NG *                           | CM, CP & NG *                                       | 2.185 (28.5%)            | CM, CP & NG *                            | Private PG *                                        | 2.883 (22.5%)            | CM, CP & NG *                              | Silviculture                                        | 36.840 (73.4%)           |
| 135                                             |                                         |                                                     |                          |                                          |                                                     |                          |                                            |                                                     |                          |
| 136Coal products                                | CM, CP & NG *                           | CM, CP & NG *                                       | 2.380 (15.7%)            | CM, CP & NG *                            | Private PG *                                        | 3.140 (22.6%)            | CM, CP & NG *                              | Silviculture                                        | 40.132 (71.6%)           |
| 137Paving materials                             | CM, CP & NG *                           | CM, CP & NG *                                       | 0.480 (12.4%)            | CM, CP & NG *                            | Private PG *                                        | 0.634 (9.3%)             | CM, CP & NG *                              | Silviculture                                        | 8.100 (33.7%)            |
| 138Plastic products                             | CM, CP & NG *                           | CM, CP & NG *                                       | 0.159 (3.8%)             | CM, CP & NG *                            | Private PG *                                        | 0.209 (3.0%)             | Wood chips                                 | Silviculture                                        | 3.326 (7.7%)             |
| 139Tires and inner tubes                        | Inedible crops *                        | Inedible crops *                                    | 0.179 (2.8%)             | CM, CP & NG *                            | Private PG *                                        | 0.201 (2.0%)             | Inedible crops *                           | Inedible crops *                                    | 4.797 (10.8%)            |
| 140Rubber footwear                              | CM, CP & NG *                           | CM, CP & NG *                                       | 0.077 (2.5%)             | CM, CP & NG *                            | Private PG *                                        | 0.102 (1.2%)             | Wood chips                                 | Silviculture                                        | 2.906 (12.1%)            |
| 141Plastic footwear                             | CM, CP & NG *                           | CM, CP & NG *                                       | 0.098 (2.5%)             | CM, CP & NG *                            | Private PG *                                        | 0.129 (1.7%)             | Wood chips                                 | Silviculture                                        | 3.647 (14.6%)            |
| 142Other rubber products                        | CM, CP & NG *                           | CM, CP & NG *                                       | 0.103 (2.5%)             | CM, CP & NG *                            | Private PG *                                        | 0.135 (2.1%)             | Wood chips                                 | Silviculture                                        | 3.255 (10.0%)            |
| 143Leather footwear                             | Leather & fur skins                     | Electricity                                         | 0.050 (2.1%)             | Rubber footwear                          | Rubber footwear                                     | 0.235 (5.8%)             | Leather & fur skins                        | Crops for feed *                                    | 13.401 (10.7%)           |
| 144Leather and fur skins                        | Slaughtering *                          | Beef cattle                                         | 0.339 (6.8%)             | Slaughtering *                           | Electricity                                         | 0.111 (2.0%)             | Slaughtering *                             | Crops for feed *                                    | 95.758 (18.3%)           |
| 145Miscellaneous leather products               | CM, CP & NG *                           | CM, CP & NG *                                       | 0.063 (2.4%)             | CM, CP & NG *                            | Private PG *                                        | 0.084 (2.0%)             | Leather & fur skins                        | Crops for feed *                                    | 10.044 (10.3%)           |
| 146Sheet glass and safety glass                 | CM, CP & NG *                           | CM, CP & NG *                                       | 0.096 (1.8%)             | CM, CP & NG *                            | Private PG *                                        | 0.127 (0.9%)             | Logs                                       | Silviculture                                        | 5.407 (10.1%)            |
| 147Glass fiber and glass fiber products         | CM, CP & NG *                           | CM, CP & NG *                                       | 0.190 (2.0%)             | CM, CP & NG *                            | Private PG *                                        | 0.251 (1.7%)             | Wood chips                                 | Silviculture                                        | 4.313 (10.9%)            |
| 148Other glass products                         | CM, CP & NG *                           | CM, CP & NG *                                       | 0.131 (2.3%)             | CM, CP & NG *                            | Private PG *                                        | 0.173 (1.6%)             | Wood chips                                 | Silviculture                                        | 5.919 (17.4%)            |

Table S4. *Cont.*

|                                     | GWP (t·CO <sub>2</sub> ·eq/million JPY) |                                                     |                          | DAP (kg·SO <sub>2</sub> ·eq/million JPY) |                                                     |                          | WSI (m <sup>3</sup> ·water·eq/million JPY) |                                                     |                          |
|-------------------------------------|-----------------------------------------|-----------------------------------------------------|--------------------------|------------------------------------------|-----------------------------------------------------|--------------------------|--------------------------------------------|-----------------------------------------------------|--------------------------|
|                                     | Imported Raw Material <i>j</i>          | Sector <i>i</i> Where Potential Impacts are Induced | Foreign Potential Impact | Imported Raw Material <i>j</i>           | Sector <i>i</i> Where Potential Impacts are Induced | Foreign Potential Impact | Imported Raw Material <i>j</i>             | Sector <i>i</i> Where Potential Impacts are Induced | Foreign Potential Impact |
| 149Cement                           | CM, CP & NG *                           | CM, CP & NG *                                       | 0.509 (0.4%)             | CM, CP & NG *                            | Private PG *                                        | 0.672 (0.3%)             | CM, CP & NG *                              | Silviculture                                        | 8.588 (19.1%)            |
| 150 Ready mixed concrete            | Cement                                  | Cement                                              | 0.349 (1.3%)             | Cement                                   | Cement                                              | 0.542 (1.3%)             | CM, CP & NG *                              | Silviculture                                        | 3.110 (13.4%)            |
| 151Cement products                  | CM, CP & NG *                           | CM, CP & NG *                                       | 0.096 (0.9%)             | Cement                                   | Cement                                              | 0.139 (0.7%)             | CM, CP & NG *                              | Silviculture                                        | 1.616 (7.0%)             |
| 152 Pottery, china and earthenware  | CM, CP & NG *                           | CM, CP & NG *                                       | 0.162 (2.4%)             | CM, CP & NG *                            | Private PG *                                        | 0.214 (1.9%)             | Wood chips                                 | Silviculture                                        | 9.472 (16.5%)            |
| 153Clay refractories                | CM, CP & NG *                           | CM, CP & NG *                                       | 0.125 (1.6%)             | Aluminum *                               | Aluminum *                                          | 0.215 (1.0%)             | Logs                                       | Silviculture                                        | 2.802 (8.5%)             |
| 154 Other structural clay products  | CM, CP & NG *                           | CM, CP & NG *                                       | 0.205 (2.1%)             | CM, CP & NG *                            | Private PG *                                        | 0.271 (0.2%)             | Wood chips                                 | Silviculture                                        | 17.045 (21.7%)           |
| 155 Carbon and graphite products    | CM, CP & NG *                           | CM, CP & NG *                                       | 0.180 (2.3%)             | CM, CP & NG *                            | Private PG *                                        | 0.237 (1.5%)             | CM, CP & NG *                              | Silviculture                                        | 3.032 (6.9%)             |
| 156Abrasive Miscellaneous           | CM, CP & NG *                           | CM, CP & NG *                                       | 0.078 (2.0%)             | Aluminum *                               | Aluminum *                                          | 0.110 (1.0%)             | Wood chips                                 | Silviculture                                        | 4.779 (14.7%)            |
| 157ceramic, stone and clay products | CM, CP & NG *                           | CM, CP & NG *                                       | 0.117 (1.8%)             | NM ores *                                | NM ores *                                           | 0.206 (2.4%)             | Edible crops *                             | Edible crops *                                      | 3.527 (10.5%)            |
| 158Pig iron                         | Metallic ores                           | Private PG *                                        | 0.800 (1.2%)             | Metallic ores                            | Private PG *                                        | 1.859 (4.6%)             | Metallic ores                              | Silviculture                                        | 20.625 (42.2%)           |
| 159Ferro alloys                     | Metallic ores                           | Private PG *                                        | 0.611 (3.5%)             | Metallic ores                            | Private PG *                                        | 1.420 (4.5%)             | Metallic ores                              | Silviculture                                        | 15.759 (12.2%)           |
| 160 Crude steel (converters)        | Pig iron                                | Pig iron                                            | 0.613 (1.4%)             | Metallic ores                            | Private PG *                                        | 1.087 (3.8%)             | Metallic ores                              | Silviculture                                        | 12.066 (30.9%)           |
| 161 Crude steel (electric furnaces) | Ferro alloys                            | Ferro alloys                                        | 1.367 (12.6%)            | Ferro alloys                             | Ferro alloys                                        | 2.669 (17.9%)            | Ferro alloys                               | Industrial WS *                                     | 11.484 (21.2%)           |
| 162Scrap iron                       | -                                       | -                                                   | -                        | -                                        | -                                                   | -                        | -                                          | -                                                   | -                        |
| 163Hot rolled steel                 | Ferro alloys                            | Ferro alloys                                        | 0.395 (1.6%)             | Ferro alloys                             | Ferro alloys                                        | 0.771 (4.1%)             | Metallic ores                              | Silviculture                                        | 6.338 (14.0%)            |
| 164 Steel pipes and tubes           | Hot rolled steel                        | Pig iron                                            | 0.383 (2.3%)             | Ferro alloys                             | Ferro alloys                                        | 0.432 (3.2%)             | Metallic ores                              | Silviculture                                        | 3.646 (8.1%)             |



Table S4. *Cont.*

|                                                              | GWP (t·CO <sub>2</sub> ·eq/million JPY) |                                                     |                          | DAP (kg·SO <sub>2</sub> ·eq/million JPY) |                                                     |                          | WSI (m <sup>3</sup> ·water·eq/million JPY) |                                                     |                          |
|--------------------------------------------------------------|-----------------------------------------|-----------------------------------------------------|--------------------------|------------------------------------------|-----------------------------------------------------|--------------------------|--------------------------------------------|-----------------------------------------------------|--------------------------|
|                                                              | Imported Raw Material <i>j</i>          | Sector <i>i</i> Where Potential Impacts are Induced | Foreign Potential Impact | Imported Raw Material <i>j</i>           | Sector <i>i</i> Where Potential Impacts are Induced | Foreign Potential Impact | Imported Raw Material <i>j</i>             | Sector <i>i</i> Where Potential Impacts are Induced | Foreign Potential Impact |
| 177 Electric wires and cables                                | Metallic ores                           | Private PG *                                        | 0.503 (11.2%)            | Metallic ores                            | Private PG *                                        | 1.169 (15.0%)            | Metallic ores                              | Silviculture                                        | 12.974 (26.5%)           |
| 178 Optical fiber cables Rolled and drawn                    | CM, CP & NG *                           | CM, CP & NG *                                       | 0.134 (2.6%)             | CM, CP & NG *                            | Private PG *                                        | 0.176 (2.2%)             | Wood chips                                 | Silviculture                                        | 6.835 (12.9%)            |
| 179 copper and copper alloys                                 | Metallic ores                           | Private PG *                                        | 0.716 (13.7%)            | Metallic ores                            | Private PG *                                        | 1.663 (18.2%)            | Metallic ores                              | Silviculture                                        | 18.451 (39.2%)           |
| 180 Rolled and drawn aluminum                                | Aluminum *                              | Aluminum *                                          | 0.627 (16.6%)            | Aluminum *                               | Aluminum *                                          | 2.921 (28.8%)            | Aluminum *                                 | Industrial WS *                                     | 4.155 (13.0%)            |
| 181 Non-ferrous metal castings and forgings                  | Aluminum *                              | Aluminum *                                          | 0.461 (8.5%)             | Aluminum *                               | Aluminum *                                          | 2.147 (23.5%)            | Aluminum *                                 | Industrial WS *                                     | 3.053 (9.8%)             |
| 182 Nuclear fuels                                            | NF metals *                             | Private PG *                                        | 0.276 (12.2%)            | NF metals *                              | Private PG *                                        | 0.641 (19.4%)            | NF metals *                                | Silviculture                                        | 5.134 (35.1%)            |
| 183 Other non-ferrous metal products                         | NF metals *                             | Private PG *                                        | 0.706 (13.8%)            | NF metals *                              | Private PG *                                        | 1.641 (17.7%)            | NF metals *                                | Silviculture                                        | 13.139 (25.0%)           |
| 184 Metal products for construction                          | Hot rolled steel                        | Pig iron                                            | 0.151 (1.9%)             | Ferro alloys                             | Ferro alloys                                        | 0.175 (2.4%)             | CM, CP & NG *                              | Silviculture                                        | 1.871 (8.0%)             |
| 185 Metal products for architecture                          | Aluminum *                              | Aluminum *                                          | 0.100 (2.1%)             | Aluminum *                               | Aluminum *                                          | 0.465 (7.9%)             | Logs                                       | Silviculture                                        | 3.651 (10.6%)            |
| 186 Gas and oil appliances and heating and cooking apparatus | Hot rolled steel                        | Pig iron                                            | 0.091 (1.5%)             | Aluminum *                               | Aluminum *                                          | 0.153 (2.3%)             | Wood chips                                 | Silviculture                                        | 4.436 (12.7%)            |
| 187 Bolts, nuts, rivets and springs                          | Hot rolled steel                        | Pig iron                                            | 0.115 (1.8%)             | Metallic ores                            | Private PG *                                        | 0.148 (2.4%)             | Metallic ores                              | Silviculture                                        | 1.643 (7.3%)             |



Table S4. Cont.

|                                                              | GWP (t·CO <sub>2</sub> ·eq/million JPY) |                                                     |                          | DAP (kg·SO <sub>2</sub> ·eq/million JPY) |                                                     |                          | WSI (m <sup>3</sup> ·water·eq/million JPY) |                                                     |                          |
|--------------------------------------------------------------|-----------------------------------------|-----------------------------------------------------|--------------------------|------------------------------------------|-----------------------------------------------------|--------------------------|--------------------------------------------|-----------------------------------------------------|--------------------------|
|                                                              | Imported Raw Material <i>j</i>          | Sector <i>i</i> Where Potential Impacts are Induced | Foreign Potential Impact | Imported Raw Material <i>j</i>           | Sector <i>i</i> Where Potential Impacts are Induced | Foreign Potential Impact | Imported Raw Material <i>j</i>             | Sector <i>i</i> Where Potential Impacts are Induced | Foreign Potential Impact |
| 188 Metal containers, fabricated plate and sheet metal       | CM, CP & NG *                           | CM, CP & NG *                                       | 0.088 (1.5%)             | CM, CP & NG *                            | Private PG *                                        | 0.116 (2.0%)             | Logs                                       | Silviculture                                        | 2.348 (8.6%)             |
| 189 Plumber's supplies, powder metallurgy products and tools | NF metals *                             | Private PG *                                        | 0.075 (1.7%)             | NF metals *                              | Private PG *                                        | 0.175 (3.2%)             | Wood chips                                 | Silviculture                                        | 1.854 (7.9%)             |
| 190 Other metal products                                     | CM, CP & NG *                           | CM, CP & NG *                                       | 0.076 (1.6%)             | Aluminum *                               | Aluminum *                                          | 0.208 (3.6%)             | Wood chips                                 | Silviculture                                        | 1.493 (7.2%)             |
| 191 Boilers                                                  | CM, CP & NG *                           | CM, CP & NG *                                       | 0.051 (1.8%)             | CM, CP & NG *                            | Private PG *                                        | 0.067 (1.8%)             | Wood chips                                 | Silviculture                                        | 1.533 (11.0%)            |
| 192 Turbines                                                 | CM, CP & NG *                           | CM, CP & NG *                                       | 0.063 (1.6%)             | CM, CP & NG *                            | Private PG *                                        | 0.083 (1.7%)             | Wood chips                                 | Silviculture                                        | 1.459 (7.8%)             |
| 193 Engines                                                  | CM, CP & NG *                           | CM, CP & NG *                                       | 0.072 (1.6%)             | Aluminum *                               | Aluminum *                                          | 0.101 (1.9%)             | Wood chips                                 | Silviculture                                        | 1.667 (8.6%)             |
| 194 Conveyors                                                | CM, CP & NG *                           | CM, CP & NG *                                       | 0.062 (1.6%)             | CM, CP & NG *                            | Private PG *                                        | 0.081 (1.9%)             | Wood chips                                 | Silviculture                                        | 1.900 (9.6%)             |
| 195 Refrigerators and air conditioning apparatus             | CM, CP & NG *                           | CM, CP & NG *                                       | 0.054 (0.8%)             | CM, CP & NG *                            | Private PG *                                        | 0.071 (1.8%)             | Wood chips                                 | Silviculture                                        | 2.310 (10.9%)            |
| 196 Pumps and compressors                                    | CM, CP & NG *                           | CM, CP & NG *                                       | 0.065 (1.5%)             | Aluminum *                               | Aluminum *                                          | 0.094 (2.0%)             | Wood chips                                 | Silviculture                                        | 1.612 (8.6%)             |
| 197 Machinists' precision tools                              | CM, CP & NG *                           | CM, CP & NG *                                       | 0.060 (1.6%)             | CM, CP & NG *                            | Private PG *                                        | 0.079 (1.7%)             | Wood chips                                 | Silviculture                                        | 2.028 (10.4%)            |
| 198 Other general industrial machinery and equipment         | CM, CP & NG *                           | CM, CP & NG *                                       | 0.065 (1.6%)             | CM, CP & NG *                            | Private PG *                                        | 0.086 (1.7%)             | Wood chips                                 | Silviculture                                        | 1.530 (7.8%)             |
| 199 Machinery and equipment for construction and mining      | CM, CP & NG *                           | CM, CP & NG *                                       | 0.067 (1.7%)             | CM, CP & NG *                            | Private PG *                                        | 0.088 (1.8%)             | Wood chips                                 | Silviculture                                        | 1.824 (9.2%)             |

Table S4. *Cont.*

|     | GWP (t·CO <sub>2</sub> ·eq/million JPY)    |                                                     |                          | DAP (kg·SO <sub>2</sub> ·eq/million JPY) |                                                     |                          | WSI (m <sup>3</sup> ·water·eq/million JPY) |                                                     |                          |
|-----|--------------------------------------------|-----------------------------------------------------|--------------------------|------------------------------------------|-----------------------------------------------------|--------------------------|--------------------------------------------|-----------------------------------------------------|--------------------------|
|     | Imported Raw Material <i>j</i>             | Sector <i>i</i> Where Potential Impacts are Induced | Foreign Potential Impact | Imported Raw Material <i>j</i>           | Sector <i>i</i> Where Potential Impacts are Induced | Foreign Potential Impact | Imported Raw Material <i>j</i>             | Sector <i>i</i> Where Potential Impacts are Induced | Foreign Potential Impact |
| 200 | Chemical machinery                         | CM, CP & NG *                                       | 0.054 (1.8%)             | CM, CP & NG *                            | Private PG *                                        | 0.071 (2.0%)             | Wood chips                                 | Silviculture                                        | 1.692 (9.8%)             |
| 201 | Industrial robots                          | CM, CP & NG *                                       | 0.060 (1.8%)             | CM, CP & NG *                            | Private PG *                                        | 0.079 (2.1%)             | Wood chips                                 | Silviculture                                        | 2.159 (5.8%)             |
| 202 | Metal machine tools                        | CM, CP & NG *                                       | 0.053 (1.6%)             | CM, CP & NG *                            | Private PG *                                        | 0.071 (2.0%)             | Wood chips                                 | Silviculture                                        | 1.748 (9.8%)             |
| 203 | Metal processing machinery                 | CM, CP & NG *                                       | 0.064 (1.6%)             | CM, CP & NG *                            | Private PG *                                        | 0.084 (2.0%)             | Wood chips                                 | Silviculture                                        | 1.507 (8.6%)             |
| 204 | Machinery for agricultural use             | CM, CP & NG *                                       | 0.065 (1.7%)             | CM, CP & NG *                            | Private PG *                                        | 0.086 (1.9%)             | Wood chips                                 | Silviculture                                        | 1.650 (9.7%)             |
| 205 | Textile machinery                          | CM, CP & NG *                                       | 0.057 (1.6%)             | CM, CP & NG *                            | Private PG *                                        | 0.075 (1.7%)             | Wood chips                                 | Silviculture                                        | 1.982 (9.9%)             |
| 206 | Food processing machinery and equipment    | CM, CP & NG *                                       | 0.066 (1.5%)             | CM, CP & NG *                            | Private PG *                                        | 0.088 (1.8%)             | Wood chips                                 | Silviculture                                        | 1.587 (8.6%)             |
| 207 | Semiconductor making equipment             | SM equipment *                                      | 0.073 (2.6%)             | SM equipment *                           | Electricity                                         | 0.091 (2.6%)             | Wood chips                                 | Silviculture                                        | 1.877 (9.7%)             |
| 208 | Vacuum equipment and vacuum component      | CM, CP & NG *                                       | 0.061 (1.6%)             | CM, CP & NG *                            | Private PG *                                        | 0.081 (1.8%)             | Wood chips                                 | Silviculture                                        | 1.561 (9.2%)             |
| 209 | Other special machinery for industrial use | Special machinery *                                 | 0.057 (1.7%)             | CM, CP & NG *                            | Private PG *                                        | 0.070 (1.7%)             | Wood chips                                 | Silviculture                                        | 1.558 (8.8%)             |
| 210 | Metal molds                                | CM, CP & NG *                                       | 0.060 (1.5%)             | CM, CP & NG *                            | Private PG *                                        | 0.079 (1.8%)             | Wood chips                                 | Silviculture                                        | 1.604 (9.8%)             |
| 211 | Bearings                                   | Hot rolled steel                                    | 0.111 (1.8%)             | CM, CP & NG *                            | Private PG *                                        | 0.126 (1.9%)             | Wood chips                                 | Silviculture                                        | 2.021 (9.7%)             |
| 212 | Other general machines and parts           | CM, CP & NG *                                       | 0.061 (1.6%)             | Metallic ores                            | Private PG *                                        | 0.138 (2.8%)             | Wood chips                                 | Silviculture                                        | 1.645 (8.5%)             |
| 213 | Copy machine                               | Integrated circuits                                 | 0.112 (3.5%)             | Integrated circuits                      | Electricity                                         | 0.140 (3.1%)             | Wood chips                                 | Silviculture                                        | 3.256 (11.0%)            |

Table S4. Cont.

|                                                          | GWP (t·CO <sub>2</sub> ·eq/million JPY) |                                                     |                          | DAP (kg·SO <sub>2</sub> ·eq/million JPY) |                                                     |                          | WSI (m <sup>3</sup> ·water·eq/million JPY) |                                                     |                          |
|----------------------------------------------------------|-----------------------------------------|-----------------------------------------------------|--------------------------|------------------------------------------|-----------------------------------------------------|--------------------------|--------------------------------------------|-----------------------------------------------------|--------------------------|
|                                                          | Imported Raw Material <i>j</i>          | Sector <i>i</i> Where Potential Impacts are Induced | Foreign Potential Impact | Imported Raw Material <i>j</i>           | Sector <i>i</i> Where Potential Impacts are Induced | Foreign Potential Impact | Imported Raw Material <i>j</i>             | Sector <i>i</i> where Potential Impacts are Induced | Foreign Potential Impact |
| 214 Other office machines                                | Integrated circuits                     | Electricity                                         | 0.073 (2.7%)             | Integrated circuits                      | Electricity                                         | 0.091 (2.4%)             | Wood chips                                 | Silviculture                                        | 3.495 (13.8%)            |
| 215 Machinery for service industry                       | CM, CP & NG *                           | CM, CP & NG *                                       | 0.055 (1.7%)             | CM, CP & NG *                            | Private PG *                                        | 0.073 (1.8%)             | Logs                                       | Silviculture                                        | 4.049 (11.7%)            |
| 216 Rotating electrical equipment                        | CM, CP & NG *                           | CM, CP & NG *                                       | 0.069 (1.6%)             | Aluminum *                               | Aluminum *                                          | 0.102 (2.0%)             | Wood chips                                 | Silviculture                                        | 2.596 (10.1%)            |
| 217 Transformers and reactors                            | CM, CP & NG *                           | CM, CP & NG *                                       | 0.062 (1.6%)             | Metallic ores                            | Private PG *                                        | 0.096 (2.0%)             | Wood chips                                 | Silviculture                                        | 5.002 (15.6%)            |
| 218 Relay switches and switchboards                      | CM, CP & NG *                           | CM, CP & NG *                                       | 0.055 (1.5%)             | CM, CP & NG *                            | Private PG *                                        | 0.073 (1.9%)             | Wood chips                                 | Silviculture                                        | 2.486 (9.7%)             |
| 219 Wiring devices and supplies                          | CM, CP & NG *                           | CM, CP & NG *                                       | 0.056 (2.0%)             | Metallic ores                            | Private PG *                                        | 0.103 (2.8%)             | Wood chips                                 | Silviculture                                        | 2.628 (11.4%)            |
| 220 Electrical equipment for internal combustion engines | CM, CP & NG *                           | CM, CP & NG *                                       | 0.057 (1.8%)             | Aluminum *                               | Aluminum *                                          | 0.110 (2.7%)             | Wood chips                                 | Silviculture                                        | 2.738 (9.5%)             |
| 221 Other electrical devices and parts                   | CM, CP & NG *                           | CM, CP & NG *                                       | 0.059 (1.9%)             | Aluminum *                               | Aluminum *                                          | 0.122 (2.8%)             | Wood chips                                 | Silviculture                                        | 5.322 (16.4%)            |
| 222 Applied electronic equipment                         | Integrated circuits                     | Electricity                                         | 0.116 (4.8%)             | Integrated circuits                      | Electricity                                         | 0.145 (4.5%)             | Wood chips                                 | Silviculture                                        | 2.776 (10.2%)            |
| 223 Electric measuring instruments                       | Integrated circuits                     | Electricity                                         | 0.098 (4.5%)             | Integrated circuits                      | Electricity                                         | 0.122 (4.3%)             | Wood chips                                 | Silviculture                                        | 2.324 (10.2%)            |
| 224 Electric bulbs                                       | CM, CP & NG *                           | CM, CP & NG *                                       | 0.059 (2.2%)             | CM, CP & NG *                            | Private PG *                                        | 0.078 (2.0%)             | Wood chips                                 | Silviculture                                        | 4.938 (17.4%)            |
| 225 Electric lighting fixtures and apparatus             | CM, CP & NG *                           | CM, CP & NG *                                       | 0.065 (2.2%)             | CM, CP & NG *                            | Private PG *                                        | 0.086 (2.3%)             | Wood chips                                 | Silviculture                                        | 3.122 (10.8%)            |
| 226 Batteries                                            | Metallic ores                           | Private PG *                                        | 0.099 (2.3%)             | Metallic ores                            | Private PG *                                        | 0.231 (3.5%)             | Wood chips                                 | Silviculture                                        | 3.547 (9.5%)             |

Table S4. Cont.

|                                                             | GWP (t·CO <sub>2</sub> ·eq/million JPY) |                                                     |                          | DAP (kg·SO <sub>2</sub> ·eq/million JPY) |                                                     |                          | WSI (m <sup>3</sup> ·water·eq/million JPY) |                                                     |                          |
|-------------------------------------------------------------|-----------------------------------------|-----------------------------------------------------|--------------------------|------------------------------------------|-----------------------------------------------------|--------------------------|--------------------------------------------|-----------------------------------------------------|--------------------------|
|                                                             | Imported Raw Material <i>j</i>          | Sector <i>i</i> Where Potential Impacts are Induced | Foreign Potential Impact | Imported Raw Material <i>j</i>           | Sector <i>i</i> Where Potential Impacts are Induced | Foreign Potential Impact | Imported Raw Material <i>j</i>             | Sector <i>i</i> Where Potential Impacts are Induced | Foreign Potential Impact |
| 227 Other electrical devices and parts                      | NF metals *                             | Private PG *                                        | 0.220 (6.2%)             | NF metals *                              | Private PG *                                        | 0.512 (9.8%)             | NF metals *                                | Silviculture                                        | 4.096 (12.5%)            |
| 228 Household air conditioners                              | Integrated circuits                     | Electricity                                         | 0.062 (1.8%)             | Integrated circuits                      | Electricity                                         | 0.078 (1.9%)             | Wood chips                                 | Silviculture                                        | 3.420 (12.5%)            |
| 229 Household electric appliances (except air-conditioners) | CM, CP & NG *                           | CM, CP & NG *                                       | 0.057 (1.8%)             | CM, CP & NG *                            | Private PG *                                        | 0.075 (1.9%)             | Wood chips                                 | Silviculture                                        | 3.218 (11.7%)            |
| 230 Video recording and playback equipment                  | Integrated circuits                     | Electricity                                         | 0.114 (3.7%)             | Integrated circuits                      | Electricity                                         | 0.142 (3.4%)             | Wood chips                                 | Silviculture                                        | 3.802 (10.4%)            |
| 231 Electric audio equipment                                | Integrated circuits                     | Electricity                                         | 0.098 (3.4%)             | Integrated circuits                      | Electricity                                         | 0.122 (3.1%)             | Wood chips                                 | Silviculture                                        | 3.738 (10.4%)            |
| 232 Radio and television sets                               | Integrated circuits                     | Electricity                                         | 0.084 (2.8%)             | Integrated circuits                      | Electricity                                         | 0.104 (2.7%)             | Wood chips                                 | Silviculture                                        | 3.298 (10.5%)            |
| 233 Wired communication equipment                           | Integrated circuits                     | Electricity                                         | 0.069 (2.6%)             | Integrated circuits                      | Electricity                                         | 0.086 (2.3%)             | Wood chips                                 | Silviculture                                        | 3.916 (12.8%)            |
| 234 Cellular phones                                         | Integrated circuits                     | Electricity                                         | 0.121 (4.4%)             | Integrated circuits                      | Electricity                                         | 0.151 (4.1%)             | Wood chips                                 | Silviculture                                        | 2.952 (10.3%)            |
| 235 Radio communication equipment (except cellular phones)  | Integrated circuits                     | Electricity                                         | 0.083 (3.0%)             | Integrated circuits                      | Electricity                                         | 0.103 (2.8%)             | Wood chips                                 | Silviculture                                        | 3.500 (12.1%)            |
| 236 Other communication equipment                           | S devices *                             | S devices *                                         | 0.069 (2.8%)             | Integrated circuits                      | Electricity                                         | 0.067 (2.1%)             | Wood chips                                 | Silviculture                                        | 3.080 (12.4%)            |
| 237 Personal Computers                                      | Integrated circuits                     | Electricity                                         | 0.151 (5.6%)             | Integrated circuits                      | Electricity                                         | 0.189 (5.2%)             | Wood chips                                 | Silviculture                                        | 2.880 (9.7%)             |

Table S4. Cont.

|                                                                | GWP (t·CO <sub>2</sub> ·eq/million JPY) |                                                     |                          | DAP (kg·SO <sub>2</sub> ·eq/million JPY) |                                                     |                          | WSI (m <sup>3</sup> ·water·eq/million JPY) |                                                     |                          |
|----------------------------------------------------------------|-----------------------------------------|-----------------------------------------------------|--------------------------|------------------------------------------|-----------------------------------------------------|--------------------------|--------------------------------------------|-----------------------------------------------------|--------------------------|
|                                                                | Imported Raw Material <i>j</i>          | Sector <i>i</i> Where Potential Impacts are Induced | Foreign Potential Impact | Imported Raw Material <i>j</i>           | Sector <i>i</i> Where Potential Impacts are Induced | Foreign Potential Impact | Imported Raw Material <i>j</i>             | Sector <i>i</i> Where Potential Impacts are Induced | Foreign Potential Impact |
| 238 Electronic computing equipment (except personal computers) | Integrated circuits                     | Electricity                                         | 0.125 (5.7%)             | Integrated circuits                      | Electricity                                         | 0.156 (5.3%)             | Wood chips                                 | Silviculture                                        | 2.374 (10.6%)            |
| 239 Electronic computing equipment (accessory equipment)       | Integrated circuits                     | Electricity                                         | 0.139 (5.3%)             | Integrated circuits                      | Electricity                                         | 0.173 (5.0%)             | Wood chips                                 | Silviculture                                        | 2.378 (9.2%)             |
| 240 Semiconductor devices                                      | CM, CP & NG *                           | CM, CP & NG *                                       | 0.053 (0.6%)             | NF metals *                              | Private PG *                                        | 0.083 (2.3%)             | Wood chips                                 | Silviculture                                        | 2.389 (8.6%)             |
| 241 Integrated circuits                                        | Integrated circuits                     | Electricity                                         | 0.072 (1.9%)             | Integrated circuits                      | Electricity                                         | 0.090 (1.9%)             | Wood chips                                 | Silviculture                                        | 3.187 (8.7%)             |
| 242 Electron tubes                                             | Glass products *                        | Glass products *                                    | 0.141 (3.6%)             | Glass products *                         | Glass products *                                    | 0.269 (4.4%)             | Wood chips                                 | Silviculture                                        | 3.309 (12.3%)            |
| 243 Liquid crystal element                                     | S devices *                             | S devices *                                         | 0.241 (5.8%)             | Integrated circuits                      | Electricity                                         | 0.175 (4.0%)             | Wood chips                                 | Silviculture                                        | 3.062 (5.8%)             |
| 244 Magnetic tapes and discs                                   | CM, CP & NG *                           | CM, CP & NG *                                       | 0.139 (2.8%)             | CM, CP & NG *                            | Private PG *                                        | 0.183 (2.8%)             | Wood chips                                 | Silviculture                                        | 6.879 (16.8%)            |
| 245 Other electronic components                                | E components *                          | Electricity                                         | 0.075 (2.3%)             | E components *                           | Electricity                                         | 0.093 (1.9%)             | Wood chips                                 | Silviculture                                        | 3.776 (11.4%)            |
| 246 Passenger motor cars                                       | CM, CP & NG *                           | CM, CP & NG *                                       | 0.073 (1.9%)             | CM, CP & NG *                            | Private PG *                                        | 0.097 (1.8%)             | Wood chips                                 | Silviculture                                        | 2.320 (9.4%)             |
| 247 Trucks, buses and other cars                               | CM, CP & NG *                           | CM, CP & NG *                                       | 0.074 (1.9%)             | CM, CP & NG *                            | Private PG *                                        | 0.098 (1.8%)             | Wood chips                                 | Silviculture                                        | 2.176 (9.2%)             |
| 248 Two-wheel motor vehicles                                   | CM, CP & NG *                           | CM, CP & NG *                                       | 0.070 (2.1%)             | CM, CP & NG *                            | Private PG *                                        | 0.092 (1.9%)             | Wood chips                                 | Silviculture                                        | 2.298 (9.5%)             |
| 249 Motor vehicle bodies                                       | CM, CP & NG *                           | CM, CP & NG *                                       | 0.089 (1.6%)             | CM, CP & NG *                            | Private PG *                                        | 0.117 (1.9%)             | Wood chips                                 | Silviculture                                        | 1.693 (6.7%)             |
| 250 Internal combustion engines for motor vehicles and parts   | CM, CP & NG *                           | CM, CP & NG *                                       | 0.078 (1.9%)             | Aluminum *                               | Aluminum *                                          | 0.125 (2.1%)             | Wood chips                                 | Silviculture                                        | 2.158 (9.7%)             |

Table S4. *Cont.*

|                                                | GWP (t·CO <sub>2</sub> ·eq/million JPY) |                                                     |                          | DAP (kg·SO <sub>2</sub> ·eq/million JPY) |                                                     |                          | WSI (m <sup>3</sup> ·water·eq/million JPY) |                                                     |                          |
|------------------------------------------------|-----------------------------------------|-----------------------------------------------------|--------------------------|------------------------------------------|-----------------------------------------------------|--------------------------|--------------------------------------------|-----------------------------------------------------|--------------------------|
|                                                | Imported Raw Material <i>j</i>          | Sector <i>i</i> Where Potential Impacts are Induced | Foreign Potential Impact | Imported Raw Material <i>j</i>           | Sector <i>i</i> Where Potential Impacts are Induced | Foreign Potential Impact | Imported Raw Material <i>j</i>             | Sector <i>i</i> Where Potential Impacts are Induced | Foreign Potential Impact |
| 251 Motor vehicle parts and accessories        | CM, CP & NG *                           | CM, CP & NG *                                       | 0.076 (1.9%)             | CM, CP & NG *                            | Private PG *                                        | 0.101 (1.8%)             | Wood chips                                 | Silviculture                                        | 2.113 (8.7%)             |
| 252 Steel ships                                | Hot rolled steel                        | Pig iron                                            | 0.132 (1.8%)             | Ferro alloys                             | Ferro alloys                                        | 0.154 (2.0%)             | Logs                                       | Silviculture                                        | 7.030 (15.21)            |
| 253 Ships (except steel ships)                 | CM, CP & NG *                           | CM, CP & NG *                                       | 0.070 (2.2%)             | CM, CP & NG *                            | Private PG *                                        | 0.093 (1.9%)             | Logs                                       | Silviculture                                        | 34.047 (29.2%)           |
| 254 Internal combustion engines for vessels    | CM, CP & NG *                           | CM, CP & NG *                                       | 0.104 (1.8%)             | CM, CP & NG *                            | Private PG *                                        | 0.137 (1.2%)             | Wood chips                                 | Silviculture                                        | 1.774 (9.4%)             |
| 255 Repair of ships                            | CM, CP & NG *                           | CM, CP & NG *                                       | 0.068 (1.7%)             | CM, CP & NG *                            | Private PG *                                        | 0.090 (1.8%)             | Logs                                       | Silviculture                                        | 3.847 (13.1%)            |
| 256 Rolling stock                              | CM, CP & NG *                           | CM, CP & NG *                                       | 0.076 (1.6%)             | CM, CP & NG *                            | Private PG *                                        | 0.100 (1.6%)             | Logs                                       | Silviculture                                        | 4.691 (11.8%)            |
| 257 Repair of rolling stock                    | CM, CP & NG *                           | CM, CP & NG *                                       | 0.131 (1.9%)             | CM, CP & NG *                            | Private PG *                                        | 0.173 (2.4%)             | Logs                                       | Silviculture                                        | 4.910 (12.0%)            |
| 258 Aircrafts                                  | Aircrafts                               | Electricity                                         | 0.110 (4.3%)             | Aircrafts                                | Aircrafts                                           | 0.676 (9.4%)             | Wood chips                                 | Silviculture                                        | 1.463 (9.5%)             |
| 259 Repair of aircrafts                        | Aircrafts                               | Electricity                                         | 0.258 (11.8%)            | Aircrafts                                | Aircrafts                                           | 1.590 (32.2%)            | Aircrafts                                  | Silviculture                                        | 2.884 (24.1%)            |
| 260 Bicycles                                   | Bicycles                                | Bicycles                                            | 0.434 (9.1%)             | Bicycles                                 | Private PG *                                        | 0.382 (7.0%)             | Bicycles                                   | Silviculture                                        | 2.252 (12.1%)            |
| 261 Other transport equipment                  | CM, CP & NG *                           | CM, CP & NG *                                       | 0.075 (1.7%)             | CM, CP & NG *                            | Private PG *                                        | 0.099 (1.7%)             | Wood chips                                 | Silviculture                                        | 1.743 (9.5%)             |
| 262 Cameras                                    | Integrated circuits                     | Electricity                                         | 0.097 (3.9%)             | Integrated circuits                      | Electricity                                         | 0.121 (3.3%)             | Wood chips                                 | Silviculture                                        | 2.645 (10.7%)            |
| 263 Other photographic and optical instruments | CM, CP & NG *                           | CM, CP & NG *                                       | 0.060 (2.2%)             | Glass products *                         | Glass products *                                    | 0.104 (2.4%)             | Wood chips                                 | Silviculture                                        | 2.331 (10.4%)            |
| 264 Watches and clocks                         | CM, CP & NG *                           | CM, CP & NG *                                       | 0.050 (1.9%)             | Jewelry *                                | Marine culture                                      | 0.156 (4.1%)             | Wood chips                                 | Silviculture                                        | 2.204 (8.8%)             |
| 265 Professional and scientific instruments    | CM, CP & NG *                           | CM, CP & NG *                                       | 0.049 (2.0%)             | CM, CP & NG *                            | Private PG *                                        | 0.064 (2.1%)             | Wood chips                                 | Silviculture                                        | 2.354 (11.5%)            |

Table S4. Cont.

|                                                                        | GWP (t·CO <sub>2</sub> -eq/million JPY) |                                                     |                          | DAP (kg·SO <sub>2</sub> -eq/million JPY) |                                                     |                          | WSI (m <sup>3</sup> ·water·eq/million JPY) |                                                     |                          |
|------------------------------------------------------------------------|-----------------------------------------|-----------------------------------------------------|--------------------------|------------------------------------------|-----------------------------------------------------|--------------------------|--------------------------------------------|-----------------------------------------------------|--------------------------|
|                                                                        | Imported Raw Material <i>j</i>          | Sector <i>i</i> Where Potential Impacts are Induced | Foreign Potential Impact | Imported Raw Material <i>j</i>           | Sector <i>i</i> Where Potential Impacts are Induced | Foreign Potential Impact | Imported Raw Material <i>j</i>             | Sector <i>i</i> Where Potential Impacts are Induced | Foreign Potential Impact |
| 266 Analytical instruments, testing machines, measuring instruments    | Integrated circuits                     | Electricity                                         | 0.070 (3.0%)             | Integrated circuits                      | Electricity                                         | 0.087 (2.8%)             | Wood chips                                 | Silviculture                                        | 2.618 (9.1%)             |
| 267 Medical instruments                                                | Integrated circuits                     | Electricity                                         | 0.055 (2.0%)             | CM, CP & NG *                            | Private PG *                                        | 0.072 (1.8%)             | Wood chips                                 | Silviculture                                        | 2.913 (10.5%)            |
| 268 Toys and games                                                     | Integrated circuits                     | Electricity                                         | 0.130 (4.7%)             | Integrated circuits                      | Electricity                                         | 0.162 (3.4%)             | Logs                                       | Silviculture                                        | 5.920 (12.5%)            |
| 269 Sporting and athletic goods                                        | CM, CP & NG *                           | CM, CP & NG *                                       | 0.093 (2.5%)             | CM, CP & NG *                            | Private PG *                                        | 0.123 (2.0%)             | Logs                                       | Silviculture                                        | 12.299 (16.5%)           |
| 270 Musical instruments                                                | Integrated circuits                     | Electricity                                         | 0.093 (3.8%)             | Integrated circuits                      | Electricity                                         | 0.116 (3.6%)             | Logs                                       | Silviculture                                        | 62.127 (27.2%)           |
| 271 Audio and video records, other information recording media         | CM, CP & NG *                           | CM, CP & NG *                                       | 0.072 (3.1%)             | CM, CP & NG *                            | Private PG *                                        | 0.095 (2.7%)             | Wood chips                                 | Silviculture                                        | 5.764 (20.9%)            |
| 272 Stationery                                                         | CM, CP & NG *                           | CM, CP & NG *                                       | 0.077 (2.8%)             | CM, CP & NG *                            | Private PG *                                        | 0.101 (2.5%)             | Logs                                       | Silviculture                                        | 7.662 (14.2%)            |
| 273 Jewelry and adornments “Tatami” (straw matting) and straw products | NF metals *                             | Private PG *                                        | 0.170 (5.7%)             | Marine culture                           | Marine culture                                      | 0.549 (4.8%)             | Wood chips                                 | Silviculture                                        | 4.972 (9.5%)             |
| 274 matting) and straw products                                        | Inedible crops *                        | Inedible crops *                                    | 0.135 (5.6%)             | CM, CP & NG *                            | Private PG *                                        | 0.055 (2.3%)             | Tatami and straw products                  | Rice                                                | 16.997 (3.4%)            |
| 275 Ordnance                                                           | CM, CP & NG *                           | CM, CP & NG *                                       | 0.060 (1.9%)             | Aluminum *                               | Aluminum *                                          | 0.131 (2.9%)             | Wood chips                                 | Silviculture                                        | 1.961 (5.8%)             |
| 276 Miscellaneous manufacturing products                               | CM, CP & NG *                           | CM, CP & NG *                                       | 0.071 (2.6%)             | CM, CP & NG *                            | Private PG *                                        | 0.093 (2.1%)             | Logs                                       | Silviculture                                        | 18.653 (18.3%)           |
| 277 Reuse and recycling                                                | CM, CP & NG *                           | CM, CP & NG *                                       | 0.103 (3.0%)             | Harbor transport *                       | Harbor transport *                                  | 0.262 (2.1%)             | CM, CP & NG *                              | Silviculture                                        | 1.731 (6.6%)             |

Table S4. Cont.

|                                                         | GWP (t·CO <sub>2</sub> ·eq/million JPY) |                                                     |                          | DAP (kg·SO <sub>2</sub> ·eq/million JPY) |                                                     |                          | WSI (m <sup>3</sup> ·water·eq/million JPY) |                                                     |                          |
|---------------------------------------------------------|-----------------------------------------|-----------------------------------------------------|--------------------------|------------------------------------------|-----------------------------------------------------|--------------------------|--------------------------------------------|-----------------------------------------------------|--------------------------|
|                                                         | Imported Raw Material <i>j</i>          | Sector <i>i</i> Where Potential Impacts are Induced | Foreign Potential Impact | Imported Raw Material <i>j</i>           | Sector <i>i</i> Where Potential Impacts are Induced | Foreign Potential Impact | Imported Raw Material <i>j</i>             | Sector <i>i</i> Where Potential Impacts are Induced | Foreign Potential Impact |
| 278 Residential construction (wooden)                   | CM, CP & NG *                           | CM, CP & NG *                                       | 0.049 (2.1%)             | CM, CP & NG *                            | Private PG *                                        | 0.065 (1.7%)             | Logs                                       | Silviculture                                        | 156.033 (28.8%)          |
| 279 Residential construction (non-wooden)               | CM, CP & NG *                           | CM, CP & NG *                                       | 0.067 (1.9%)             | CM, CP & NG *                            | Private PG *                                        | 0.088 (1.7%)             | Logs                                       | Silviculture                                        | 41.081 (26.2%)           |
| 280 Non-residential construction (wooden)               | CM, CP & NG *                           | CM, CP & NG *                                       | 0.082 (2.1%)             | CM, CP & NG *                            | Private PG *                                        | 0.069 (1.6%)             | Timber                                     | Silviculture                                        | 114.081 (30.2%)          |
| 281 Non-residential construction (non-wooden)           | CM, CP & NG *                           | CM, CP & NG *                                       | 0.069 (2.0%)             | CM, CP & NG *                            | Private PG *                                        | 0.091 (1.8%)             | Logs                                       | Silviculture                                        | 21.751 (25.0%)           |
| 282 Repair of construction                              | CM, CP & NG *                           | CM, CP & NG *                                       | 0.063 (2.0%)             | CM, CP & NG *                            | Private PG *                                        | 0.083 (1.6%)             | Logs                                       | Silviculture                                        | 18.446 (22.7%)           |
| 283 Public construction of roads                        | CM, CP & NG *                           | CM, CP & NG *                                       | 0.105 (2.4%)             | CM, CP & NG *                            | Private PG *                                        | 0.138 (2.3%)             | Logs                                       | Silviculture                                        | 3.409 (14.3%)            |
| 284 Public construction of rivers, drainages and others | CM, CP & NG *                           | CM, CP & NG *                                       | 0.082 (2.0%)             | CM, CP & NG *                            | Private PG *                                        | 0.108 (1.8%)             | Logs                                       | Silviculture                                        | 3.220 (13.6%)            |
| 285 Agricultural public construction                    | CM, CP & NG *                           | CM, CP & NG *                                       | 0.106 (2.2%)             | CM, CP & NG *                            | Private PG *                                        | 0.140 (2.2%)             | Logs                                       | Silviculture                                        | 10.053 (21.9%)           |
| 286 Railway construction                                | CM, CP & NG *                           | CM, CP & NG *                                       | 0.080 (1.8%)             | CM, CP & NG *                            | Private PG *                                        | 0.106 (1.7%)             | Logs                                       | Silviculture                                        | 5.816 (17.7%)            |
| 287 Electric power facilities construction              | CM, CP & NG *                           | CM, CP & NG *                                       | 0.072 (2.0%)             | CM, CP & NG *                            | Private PG *                                        | 0.095 (2.1%)             | Logs                                       | Silviculture                                        | 4.192 (15.3%)            |
| 288 Telecommunication facilities construction           | CM, CP & NG *                           | CM, CP & NG *                                       | 0.072 (2.2%)             | CM, CP & NG *                            | Private PG *                                        | 0.094 (2.2%)             | Logs                                       | Silviculture                                        | 7.185 (20.7%)            |



Table S4. Cont.

|                                              | GWP (t·CO <sub>2</sub> ·eq/million JPY) |                                                     |                          | DAP (kg·SO <sub>2</sub> ·eq/million JPY) |                                                     |                          | WSI (m <sup>3</sup> ·water·eq/million JPY) |                                                     |                          |
|----------------------------------------------|-----------------------------------------|-----------------------------------------------------|--------------------------|------------------------------------------|-----------------------------------------------------|--------------------------|--------------------------------------------|-----------------------------------------------------|--------------------------|
|                                              | Imported Raw Material <i>j</i>          | Sector <i>i</i> Where Potential Impacts are Induced | Foreign Potential Impact | Imported Raw Material <i>j</i>           | Sector <i>i</i> Where Potential Impacts are Induced | Foreign Potential Impact | Imported Raw Material <i>j</i>             | Sector <i>i</i> Where Potential Impacts are Induced | Foreign Potential Impact |
| 289 Other civil engineering and construction | CM, CP & NG *                           | CM, CP & NG *                                       | 0.080 (2.0%)             | CM, CP & NG *                            | Private PG *                                        | 0.106 (1.9%)             | Logs                                       | Silviculture                                        | 5.005 (16.6%)            |
| 290 Electricity                              | CM, CP & NG *                           | CM, CP & NG *                                       | 0.660 (2.3%)             | CM, CP & NG *                            | Private PG *                                        | 0.871 (2.5%)             | CM, CP & NG *                              | Silviculture                                        | 11.127 (31.8%)           |
| 291 Private power generation                 | CM, CP & NG *                           | CM, CP & NG *                                       | 0.828 (1.2%)             | CM, CP & NG *                            | Private PG *                                        | 1.093 (0.7%)             | CM, CP & NG *                              | Silviculture                                        | 13.966 (41.8%)           |
| 292 Gas supply                               | CM, CP & NG *                           | CM, CP & NG *                                       | 1.356 (28.2%)            | CM, CP & NG *                            | Private PG *                                        | 1.789 (28.8%)            | CM, CP & NG *                              | Silviculture                                        | 22.858 (51.3%)           |
| 293 Steam and hot water supply               | CM, CP & NG *                           | CM, CP & NG *                                       | 0.381 (2.4%)             | CM, CP & NG *                            | Private PG *                                        | 0.503 (4.3%)             | CM, CP & NG *                              | Silviculture                                        | 6.428 (6.6%)             |
| 294 Water supply                             | CM, CP & NG *                           | CM, CP & NG *                                       | 0.034 (2.5%)             | CM, CP & NG *                            | Private PG *                                        | 0.045 (2.4%)             | Logs                                       | Silviculture                                        | 1.294 (0.1%)             |
| 295 Industrial water supply                  | CM, CP & NG *                           | CM, CP & NG *                                       | 0.039 (2.5%)             | CM, CP & NG *                            | Private PG *                                        | 0.051 (2.6%)             | Logs                                       | Silviculture                                        | 0.841 (0.0%)             |
| 296 Sewage disposal                          | CM, CP & NG *                           | CM, CP & NG *                                       | 0.226 (1.9%)             | CM, CP & NG *                            | Private PG *                                        | 0.299 (1.2%)             | CM, CP & NG *                              | Silviculture                                        | 3.817 (5.6%)             |
| 297 Waste management services (public)       | CM, CP & NG *                           | CM, CP & NG *                                       | 0.103 (0.6%)             | CM, CP & NG *                            | Private PG *                                        | 0.136 (1.8%)             | Wood chips                                 | Silviculture                                        | 1.831 (4.5%)             |
| 298 Waste management services (private)      | CM, CP & NG *                           | CM, CP & NG *                                       | 0.062 (0.8%)             | CM, CP & NG *                            | Private PG *                                        | 0.082 (2.0%)             | Wood chips                                 | Silviculture                                        | 1.342 (7.6%)             |
| 299 Wholesale trade                          | CM, CP & NG *                           | CM, CP & NG *                                       | 0.036 (3.4%)             | CM, CP & NG *                            | Private PG *                                        | 0.048 (4.1%)             | Wood chips                                 | Silviculture                                        | 2.019 (17.7%)            |
| 300 Retail trade                             | CM, CP & NG *                           | CM, CP & NG *                                       | 0.065 (3.0%)             | CM, CP & NG *                            | Private PG *                                        | 0.086 (3.1%)             | Wood chips                                 | Silviculture                                        | 2.963 (20.2%)            |
| 301 Financial service                        | CM, CP & NG *                           | CM, CP & NG *                                       | 0.016 (2.7%)             | CM, CP & NG *                            | Private PG *                                        | 0.022 (2.2%)             | Wood chips                                 | Silviculture                                        | 3.257 (27.4%)            |
| 302 Life insurance                           | CM, CP & NG *                           | CM, CP & NG *                                       | 0.021 (2.9%)             | CM, CP & NG *                            | Private PG *                                        | 0.028 (2.5%)             | Wood chips                                 | Silviculture                                        | 2.957 (21.3%)            |
| 303 Non-life insurance                       | CM, CP & NG *                           | CM, CP & NG *                                       | 0.017 (2.5%)             | CM, CP & NG *                            | Private PG *                                        | 0.022 (2.1%)             | Wood chips                                 | Silviculture                                        | 2.908 (22.9%)            |
| 304 Real estate agencies and managers        | CM, CP & NG *                           | CM, CP & NG *                                       | 0.028 (2.7%)             | CM, CP & NG *                            | Private PG *                                        | 0.037 (2.6%)             | Wood chips                                 | Silviculture                                        | 1.755 (14.7%)            |
| 305 Real estate rental service               | CM, CP & NG *                           | CM, CP & NG *                                       | 0.028 (2.8%)             | CM, CP & NG *                            | Private PG *                                        | 0.037 (3.0%)             | Wood chips                                 | Silviculture                                        | 0.775 (7.0%)             |

Table S4. Cont.

|     | GWP (t·CO <sub>2</sub> ·eq/million JPY)                        |                                                     |                          | DAP (kg·SO <sub>2</sub> ·eq/million JPY) |                                                     |                          | WSI (m <sup>3</sup> ·water·eq/million JPY) |                                                     |                          |
|-----|----------------------------------------------------------------|-----------------------------------------------------|--------------------------|------------------------------------------|-----------------------------------------------------|--------------------------|--------------------------------------------|-----------------------------------------------------|--------------------------|
|     | Imported Raw Material <i>j</i>                                 | Sector <i>i</i> Where Potential Impacts are Induced | Foreign Potential Impact | Imported Raw Material <i>j</i>           | Sector <i>i</i> Where Potential Impacts are Induced | Foreign Potential Impact | Imported Raw Material <i>j</i>             | Sector <i>i</i> Where Potential Impacts are Induced | Foreign Potential Impact |
| 306 | House rent                                                     | CM, CP & NG *                                       | 0.013 (2.6%)             | CM, CP & NG *                            | Private PG *                                        | 0.017 (2.1%)             | Logs                                       | Silviculture                                        | 1.440 (16.4%)            |
| 307 | House rent (imputed house rent)                                | CM, CP & NG *                                       | 0.005 (2.2%)             | CM, CP & NG *                            | Private PG *                                        | 0.006 (1.9%)             | Logs                                       | Silviculture                                        | 0.933 (19.8%)            |
| 308 | Railway transport (passengers)                                 | CM, CP & NG *                                       | 0.062 (2.2%)             | CM, CP & NG *                            | Private PG *                                        | 0.082 (2.3%)             | Wood chips                                 | Silviculture                                        | 1.601 (7.5%)             |
| 309 | Railway transport (freight)                                    | CM, CP & NG *                                       | 0.117 (2.5%)             | CM, CP & NG *                            | Private PG *                                        | 0.154 (3.2%)             | Wood chips                                 | Silviculture                                        | 2.052 (9.4%)             |
| 310 | Bus transport service                                          | CM, CP & NG *                                       | 0.133 (4.4%)             | CM, CP & NG *                            | Private PG *                                        | 0.176 (4.5%)             | CM, CP & NG *                              | Silviculture                                        | 2.250 (19.1%)            |
| 311 | Hired car and taxi transport                                   | CM, CP & NG *                                       | 0.134 (4.1%)             | CM, CP & NG *                            | Private PG *                                        | 0.177 (11.0%)            | CM, CP & NG *                              | Silviculture                                        | 2.257 (21.0%)            |
| 312 | Road freight transport (except self-transport by private cars) | CM, CP & NG *                                       | 0.164 (4.3%)             | CM, CP & NG *                            | Private PG *                                        | 0.217 (4.4%)             | CM, CP & NG *                              | Silviculture                                        | 2.770 (20.5%)            |
| 313 | Self-transport by private cars (passengers)                    | CM, CP & NG *                                       | 0.640 (5.4%)             | CM, CP & NG *                            | Private PG *                                        | 0.844 (10.9%)            | CM, CP & NG *                              | Silviculture                                        | 10.784 (37.4%)           |
| 314 | Self-transport by private cars (freight)                       | CM, CP & NG *                                       | 0.552 (4.9%)             | CM, CP & NG *                            | Private PG *                                        | 0.729 (6.1%)             | CM, CP & NG *                              | Silviculture                                        | 9.313 (36.0%)            |
| 315 | Ocean transport                                                | Ocean transport                                     | 11.241 (40.4%)           | Ocean transport                          | Ocean transport                                     | 23.005 (38.5%)           | Ocean transport                            | Silviculture                                        | 5.021 (21.0%)            |
| 316 | Coastal and inland water transport                             | CM, CP & NG *                                       | 0.264 (2.0%)             | CM, CP & NG *                            | Private PG *                                        | 0.348 (0.3%)             | CM, CP & NG *                              | Silviculture                                        | 4.449 (15.6%)            |
| 317 | Harbor transport service                                       | CM, CP & NG *                                       | 0.047 (2.8%)             | CM, CP & NG *                            | Private PG *                                        | 0.062 (0.6%)             | Wood chips                                 | Silviculture                                        | 1.164 (11.6%)            |
| 318 | Air transport                                                  | CM, CP & NG *                                       | 0.244 (2.2%)             | CM, CP & NG *                            | Private PG *                                        | 0.322 (9.3%)             | CM, CP & NG *                              | Silviculture                                        | 4.110 (20.3%)            |

Table S4. *Cont.*

|     | GWP (t·CO <sub>2</sub> ·eq/million JPY)                |                                                     |                          | DAP (kg·SO <sub>2</sub> ·eq/million JPY) |                                                     |                          | WSI (m <sup>3</sup> ·water·eq/million JPY) |                                                     |                          |
|-----|--------------------------------------------------------|-----------------------------------------------------|--------------------------|------------------------------------------|-----------------------------------------------------|--------------------------|--------------------------------------------|-----------------------------------------------------|--------------------------|
|     | Imported Raw Material <i>j</i>                         | Sector <i>i</i> Where Potential Impacts are Induced | Foreign Potential Impact | Imported Raw Material <i>j</i>           | Sector <i>i</i> Where Potential Impacts are Induced | Foreign Potential Impact | Imported Raw Material <i>j</i>             | Sector <i>i</i> Where Potential Impacts are Induced | Foreign Potential Impact |
| 319 | Consigned freight forwarding                           | CM, CP & NG *                                       | 0.052 (3.6%)             | CM, CP & NG *                            | Private PG *                                        | 0.069 (3.7%)             | Wood chips                                 | Silviculture                                        | 2.053 (14.9%)            |
| 320 | Storage facility service                               | CM, CP & NG *                                       | 0.054 (2.5%)             | CM, CP & NG *                            | Private PG *                                        | 0.071 (2.4%)             | Wood chips                                 | Silviculture                                        | 3.512 (16.4%)            |
| 321 | Packing service                                        | CM, CP & NG *                                       | 0.048 (2.3%)             | CM, CP & NG *                            | Private PG *                                        | 0.064 (1.7%)             | Logs                                       | Silviculture                                        | 62.359 (25.1%)           |
| 322 | Facility service for road transport                    | CM, CP & NG *                                       | 0.032 (2.5%)             | CM, CP & NG *                            | Private PG *                                        | 0.042 (2.6%)             | Wood chips                                 | Silviculture                                        | 1.190 (6.8%)             |
| 323 | Port and water traffic control                         | CM, CP & NG *                                       | 0.043 (2.4%)             | CM, CP & NG *                            | Private PG *                                        | 0.057 (0.4%)             | Logs                                       | Silviculture                                        | 2.995 (1.9%)             |
| 324 | Services relating to water transport                   | CM, CP & NG *                                       | 0.017 (2.4%)             | CM, CP & NG *                            | Private PG *                                        | 0.022 (1.1%)             | Wood chips                                 | Silviculture                                        | 0.854 (2.7%)             |
| 325 | Airport and air traffic control (public)               | CM, CP & NG *                                       | 0.051 (2.7%)             | CM, CP & NG *                            | Private PG *                                        | 0.068 (2.5%)             | Wood chips                                 | Silviculture                                        | 3.718 (17.9%)            |
| 326 | Airport and air traffic control (industrial)           | CM, CP & NG *                                       | 0.065 (2.7%)             | CM, CP & NG *                            | Private PG *                                        | 0.086 (2.8%)             | Wood chips                                 | Silviculture                                        | 4.699 (21.7%)            |
| 327 | Services relating to air transport                     | CM, CP & NG *                                       | 0.032 (2.7%)             | CM, CP & NG *                            | Private PG *                                        | 0.042 (2.6%)             | Wood chips                                 | Silviculture                                        | 1.923 (6.0%)             |
| 328 | Travel agency and other services relating to transport | CM, CP & NG *                                       | 0.023 (2.8%)             | CM, CP & NG *                            | Private PG *                                        | 0.030 (2.7%)             | Wood chips                                 | Silviculture                                        | 3.201 (11.4%)            |
| 329 | Postal service and mail delivery                       | Air transport                                       | 0.065 (5.7%)             | Ocean transport                          | Ocean transport                                     | 0.055 (4.6%)             | Wood chips                                 | Silviculture                                        | 1.160 (16.2%)            |

Table S4. Cont.

|                                              | GWP (t·CO <sub>2</sub> ·eq/million JPY) |                                                     |                          | DAP (kg·SO <sub>2</sub> ·eq/million JPY) |                                                     |                          | WSI (m <sup>3</sup> ·water·eq/million JPY) |                                                     |                          |
|----------------------------------------------|-----------------------------------------|-----------------------------------------------------|--------------------------|------------------------------------------|-----------------------------------------------------|--------------------------|--------------------------------------------|-----------------------------------------------------|--------------------------|
|                                              | Imported Raw Material <i>j</i>          | Sector <i>i</i> Where Potential Impacts are Induced | Foreign Potential Impact | Imported Raw Material <i>j</i>           | Sector <i>i</i> Where Potential Impacts are Induced | Foreign Potential Impact | Imported Raw Material <i>j</i>             | Sector <i>i</i> Where Potential Impacts are Induced | Foreign Potential Impact |
| 330 Fixed telecommunication                  | CM, CP & NG *                           | CM, CP & NG *                                       | 0.028 (2.7%)             | CM, CP & NG *                            | Private PG *                                        | 0.037 (2.8%)             | Wood chips                                 | Silviculture                                        | 2.122 (14.5%)            |
| 331 Mobile telecommunication                 | CM, CP & NG *                           | CM, CP & NG *                                       | 0.020 (2.6%)             | CM, CP & NG *                            | Private PG *                                        | 0.026 (2.8%)             | Wood chips                                 | Silviculture                                        | 1.463 (9.9%)             |
| 332 Other telecommunication                  | CM, CP & NG *                           | CM, CP & NG *                                       | 0.035 (2.7%)             | CM, CP & NG *                            | Private PG *                                        | 0.046 (2.8%)             | Wood chips                                 | Silviculture                                        | 2.578 (16.5%)            |
| 333 Other services relating to communication | CM, CP & NG *                           | CM, CP & NG *                                       | 0.034 (2.6%)             | CM, CP & NG *                            | Private PG *                                        | 0.044 (2.9%)             | Wood chips                                 | Silviculture                                        | 1.585 (11.1%)            |
| 334 Public broadcasting                      | Air transport                           | Air transport                                       | 0.055 (3.6%)             | CM, CP & NG *                            | Private PG *                                        | 0.046 (2.8%)             | Wood chips                                 | Silviculture                                        | 1.986 (10.8%)            |
| 335 Private broadcasting                     | CM, CP & NG *                           | CM, CP & NG *                                       | 0.032 (2.7%)             | CM, CP & NG *                            | Private PG *                                        | 0.043 (2.8%)             | Wood chips                                 | Silviculture                                        | 2.357 (9.8%)             |
| 336 Cable broadcasting                       | CM, CP & NG *                           | CM, CP & NG *                                       | 0.029 (2.7%)             | CM, CP & NG *                            | Private PG *                                        | 0.039 (2.7%)             | Logs                                       | Silviculture                                        | 2.050 (12.0%)            |
| 337 Information services                     | CM, CP & NG *                           | CM, CP & NG *                                       | 0.026 (2.8%)             | CM, CP & NG *                            | Private PG *                                        | 0.034 (2.5%)             | Wood chips                                 | Silviculture                                        | 4.691 (32.4%)            |
| 338 Internet based services                  | CM, CP & NG *                           | CM, CP & NG *                                       | 0.033 (2.7%)             | CM, CP & NG *                            | Private PG *                                        | 0.043 (2.7%)             | Wood chips                                 | Silviculture                                        | 2.400 (16.4%)            |
| Image information                            |                                         |                                                     |                          |                                          |                                                     |                          |                                            |                                                     |                          |
| 339 production and distribution industry     | CM, CP & NG *                           | CM, CP & NG *                                       | 0.044 (3.1%)             | CM, CP & NG *                            | Private PG *                                        | 0.058 (2.4%)             | Wood chips                                 | Silviculture                                        | 2.436 (9.6%)             |
| 340 Newspaper                                | Pulp                                    | Pulp                                                | 0.100 (2.7%)             | Paper                                    | Paper                                               | 0.351 (3.2%)             | Wood chips                                 | Silviculture                                        | 87.056 (47.1%)           |
| 341 Publication                              | Pulp                                    | Pulp                                                | 0.065 (2.3%)             | Paper                                    | Paper                                               | 0.220 (2.9%)             | Wood chips                                 | Silviculture                                        | 56.298 (45.6%)           |
| News syndicates and                          |                                         |                                                     |                          |                                          |                                                     |                          |                                            |                                                     |                          |
| 342 private detective agencies               | Air transport                           | Air transport                                       | 0.050 (5.5%)             | CM, CP & NG *                            | Private PG *                                        | 0.032 (2.6%)             | Wood chips                                 | Silviculture                                        | 3.202 (26.2%)            |
| 343 Public administration (central)          | CM, CP & NG *                           | CM, CP & NG *                                       | 0.053 (3.5%)             | Aircrafts                                | Aircrafts                                           | 0.120 (5.6%)             | Wood chips                                 | Silviculture                                        | 1.790 (10.4%)            |
| 344 Public administration (local)            | CM, CP & NG *                           | CM, CP & NG *                                       | 0.037 (2.7%)             | CM, CP & NG *                            | Private PG *                                        | 0.049 (3.0%)             | Wood chips                                 | Silviculture                                        | 1.746 (11.6%)            |

Table S4. *Cont.*

|     | GWP (t·CO <sub>2</sub> ·eq/million JPY)                                   |                                                     |                          | DAP (kg·SO <sub>2</sub> ·eq/million JPY) |                                                     |                          | WSI (m <sup>3</sup> ·water·eq/million JPY) |                                                     |                          |
|-----|---------------------------------------------------------------------------|-----------------------------------------------------|--------------------------|------------------------------------------|-----------------------------------------------------|--------------------------|--------------------------------------------|-----------------------------------------------------|--------------------------|
|     | Imported Raw Material <i>j</i>                                            | Sector <i>i</i> Where Potential Impacts are Induced | Foreign Potential Impact | Imported Raw Material <i>j</i>           | Sector <i>i</i> Where Potential Impacts are Induced | Foreign Potential Impact | Imported Raw Material <i>j</i>             | Sector <i>i</i> Where Potential Impacts are Induced | Foreign Potential Impact |
| 345 | School education (public)                                                 | CM, CP & NG *                                       | 0.019 (2.7%)             | CM, CP & NG *                            | Private PG *                                        | 0.025 (2.8%)             | Wood chips                                 | Silviculture                                        | 1.013 (7.5%)             |
| 346 | School education (private)                                                | CM, CP & NG *                                       | 0.036 (3.0%)             | CM, CP & NG *                            | Private PG *                                        | 0.048 (2.8%)             | Wood chips                                 | Silviculture                                        | 3.334 (9.2%)             |
| 347 | Social education (public)                                                 | CM, CP & NG *                                       | 0.048 (2.5%)             | CM, CP & NG *                            | Private PG *                                        | 0.063 (2.1%)             | Crops for feed *                           | Crops for feed *                                    | 5.557 (6.9%)             |
| 348 | Social education (private, non-profit)                                    | CM, CP & NG *                                       | 0.074 (2.8%)             | CM, CP & NG *                            | Private PG *                                        | 0.098 (2.4%)             | Wood chips                                 | Silviculture                                        | 7.743 (8.3%)             |
| 349 | Other educational and training institutions (public)                      | CM, CP & NG *                                       | 0.127 (2.8%)             | CM, CP & NG *                            | Private PG *                                        | 0.168 (4.5%)             | Wood chips                                 | Silviculture                                        | 4.194 (3.7%)             |
| 350 | Other educational and training institutions (profit-making)               | CM, CP & NG *                                       | 0.085 (3.3%)             | CM, CP & NG *                            | Private PG *                                        | 0.112 (4.5%)             | Wood chips                                 | Silviculture                                        | 2.515 (13.5%)            |
| 351 | Research institutes for natural science (public)                          | CM, CP & NG *                                       | 0.102 (3.0%)             | CM, CP & NG *                            | Private PG *                                        | 0.134 (3.1%)             | Wood chips                                 | Silviculture                                        | 4.607 (6.3%)             |
| 352 | Research institutes for cultural and social science (public)              | CM, CP & NG *                                       | 0.097 (3.6%)             | CM, CP & NG *                            | Private PG *                                        | 0.127 (2.9%)             | Wood chips                                 | Silviculture                                        | 12.430 (32.8%)           |
| 353 | Research institutes for natural sciences (private, non-profit)            | CM, CP & NG *                                       | 0.079 (3.5%)             | CM, CP & NG *                            | Private PG *                                        | 0.105 (3.7%)             | Wood chips                                 | Silviculture                                        | 5.905 (13.0%)            |
| 354 | Research institutes for cultural and social science (private, non-profit) | CM, CP & NG *                                       | 0.045 (3.2%)             | CM, CP & NG *                            | Private PG *                                        | 0.059 (3.1%)             | Wood chips                                 | Silviculture                                        | 7.301 (27.9%)            |
| 355 | Research institutes for natural sciences (profit-making)                  | CM, CP & NG *                                       | 0.176 (3.4%)             | CM, CP & NG *                            | Private PG *                                        | 0.233 (3.7%)             | Wood chips                                 | Silviculture                                        | 5.456 (11.0%)            |

Table S4. *Cont.*

|     | GWP (t·CO <sub>2</sub> ·eq/million JPY)                             |                                                     |                          | DAP (kg·SO <sub>2</sub> ·eq/million JPY) |                                                     |                          | WSI (m <sup>3</sup> ·water·eq/million JPY) |                                                     |                          |
|-----|---------------------------------------------------------------------|-----------------------------------------------------|--------------------------|------------------------------------------|-----------------------------------------------------|--------------------------|--------------------------------------------|-----------------------------------------------------|--------------------------|
|     | Imported Raw Material <i>j</i>                                      | Sector <i>i</i> Where Potential Impacts are Induced | Foreign Potential Impact | Imported Raw Material <i>j</i>           | Sector <i>i</i> Where Potential Impacts are Induced | Foreign Potential Impact | Imported Raw Material <i>j</i>             | Sector <i>i</i> Where Potential Impacts are Induced | Foreign Potential Impact |
| 356 | Research institutes for cultural and social science (profit-making) | CM, CP & NG *                                       | 0.041 (3.2%)             | CM, CP & NG *                            | Private PG *                                        | 0.054 (3.0%)             | Wood chips                                 | Silviculture                                        | 7.722 (30.7%)            |
| 357 | Research and development (intra-enterprise)                         | CM, CP & NG *                                       | 0.068 (2.9%)             | CM, CP & NG *                            | Private PG *                                        | 0.090 (2.6%)             | Wood chips                                 | Silviculture                                        | 5.941 (16.6%)            |
| 358 | Medical service (public)                                            | CM, CP & NG *                                       | 0.050 (2.6%)             | CM, CP & NG *                            | Private PG *                                        | 0.066 (2.2%)             | Wood chips                                 | Silviculture                                        | 2.050 (4.5%)             |
| 359 | Medical service (non-profit foundations, etc.)                      | CM, CP & NG *                                       | 0.040 (2.6%)             | CM, CP & NG *                            | Private PG *                                        | 0.053 (2.0%)             | Wood chips                                 | Silviculture                                        | 1.636 (4.6%)             |
| 360 | Medical service (medical corporations, etc.)                        | CM, CP & NG *                                       | 0.040 (2.5%)             | CM, CP & NG *                            | Private PG *                                        | 0.053 (2.1%)             | Wood chips                                 | Silviculture                                        | 1.897 (6.9%)             |
| 361 | Health and hygiene (public)                                         | CM, CP & NG *                                       | 0.038 (2.6%)             | CM, CP & NG *                            | Private PG *                                        | 0.050 (2.1%)             | Wood chips                                 | Silviculture                                        | 3.448 (21.4%)            |
| 362 | Health and hygiene (profit-making)                                  | CM, CP & NG *                                       | 0.045 (2.5%)             | CM, CP & NG *                            | Private PG *                                        | 0.060 (2.0%)             | Wood chips                                 | Silviculture                                        | 3.308 (13.5%)            |
| 363 | Social insurance (public)                                           | CM, CP & NG *                                       | 0.039 (2.7%)             | CM, CP & NG *                            | Private PG *                                        | 0.052 (3.0%)             | Wood chips                                 | Silviculture                                        | 2.732 (11.0%)            |
| 364 | Social insurance (private, non-profit)                              | CM, CP & NG *                                       | 0.047 (2.8%)             | CM, CP & NG *                            | Private PG *                                        | 0.062 (3.1%)             | Wood chips                                 | Silviculture                                        | 2.634 (17.6%)            |
| 365 | Social welfare (public)                                             | CM, CP & NG *                                       | 0.034 (2.7%)             | Frozen fish *                            | Marine fisheries                                    | 0.161 (5.2%)             | Wood chips                                 | Silviculture                                        | 2.843 (5.0%)             |
| 366 | Social welfare (private, non-profit)                                | CM, CP & NG *                                       | 0.033 (2.6%)             | Frozen fish *                            | Marine fisheries                                    | 0.181 (6.1%)             | Wood chips                                 | Silviculture                                        | 2.959 (5.0%)             |
| 367 | Social welfare (profit-making)                                      | CM, CP & NG *                                       | 0.039 (2.7%)             | Frozen fish *                            | Marine fisheries                                    | 0.169 (4.9%)             | Wood chips                                 | Silviculture                                        | 2.830 (4.7%)             |
| 368 | Nursing care (In-home)                                              | CM, CP & NG *                                       | 0.032 (2.7%)             | Frozen fish *                            | Marine fisheries                                    | 0.189 (6.9%)             | Edible crops *                             | Edible crops *                                      | 2.684 (4.8%)             |
| 369 | Nursing care (In-facility)                                          | CM, CP & NG *                                       | 0.037 (2.6%)             | Frozen fish *                            | Marine fisheries                                    | 0.241 (7.3%)             | Edible crops *                             | Edible crops *                                      | 3.444 (5.3%)             |

Table S4. Cont.

|     | GWP (t·CO <sub>2</sub> ·eq/million JPY)             |                                                     |                          | DAP (kg·SO <sub>2</sub> ·eq/million JPY) |                                                     |                          | WSI (m <sup>3</sup> ·water·eq/million JPY) |                                                     |                          |
|-----|-----------------------------------------------------|-----------------------------------------------------|--------------------------|------------------------------------------|-----------------------------------------------------|--------------------------|--------------------------------------------|-----------------------------------------------------|--------------------------|
|     | Imported Raw Material <i>j</i>                      | Sector <i>i</i> Where Potential Impacts are Induced | Foreign Potential Impact | Imported Raw Material <i>j</i>           | Sector <i>i</i> Where Potential Impacts are Induced | Foreign Potential Impact | Imported Raw Material <i>j</i>             | Sector <i>i</i> Where Potential Impacts are Induced | Foreign Potential Impact |
| 370 | Private non-profit institutions serving enterprises | CM, CP & NG *                                       | 0.045 (2.7%)             | CM, CP & NG *                            | Private PG *                                        | 0.060 (2.1%)             | Wood chips                                 | Silviculture                                        | 4.377 (16.0%)            |
| 371 | Private non-profit institutions serving households  | CM, CP & NG *                                       | 0.032 (2.9%)             | CM, CP & NG *                            | Private PG *                                        | 0.042 (1.9%)             | Wood chips                                 | Silviculture                                        | 5.419 (19.0%)            |
| 372 | Advertising services                                | CM, CP & NG *                                       | 0.040 (2.4%)             | Paper                                    | Paper                                               | 0.072 (2.2%)             | Wood chips                                 | Silviculture                                        | 18.490 (38.0%)           |
| 373 | Goods rental and leasing (except car rental)        | CM, CP & NG *                                       | 0.020 (2.6%)             | CM, CP & NG *                            | Private PG *                                        | 0.026 (2.7%)             | Wood chips                                 | Silviculture                                        | 1.055 (14.8%)            |
| 374 | Car rental and leasing                              | CM, CP & NG *                                       | 0.034 (3.8%)             | CM, CP & NG *                            | Private PG *                                        | 0.045 (4.3%)             | Wood chips                                 | Silviculture                                        | 0.883 (10.9%)            |
| 375 | Repair of motor vehicles                            | CM, CP & NG *                                       | 0.053 (2.3%)             | CM, CP & NG *                            | Private PG *                                        | 0.070 (2.1%)             | Wood chips                                 | Silviculture                                        | 1.537 (8.4%)             |
| 376 | Repair of machine                                   | CM, CP & NG *                                       | 0.050 (1.9%)             | CM, CP & NG *                            | Private PG *                                        | 0.066 (2.0%)             | Wood chips                                 | Silviculture                                        | 1.803 (10.0%)            |
| 377 | Building maintenance services                       | CM, CP & NG *                                       | 0.022 (3.0%)             | CM, CP & NG *                            | Private PG *                                        | 0.029 (2.4%)             | Wood chips                                 | Silviculture                                        | 2.016 (11.3%)            |
| 378 | Judicial, financial and accounting services         | CM, CP & NG *                                       | 0.018 (3.1%)             | CM, CP & NG *                            | Private PG *                                        | 0.024 (1.9%)             | Wood chips                                 | Silviculture                                        | 2.214 (25.1%)            |
| 379 | Civil engineering and construction services         | CM, CP & NG *                                       | 0.030 (2.5%)             | Paper                                    | Paper                                               | 0.041 (1.4%)             | Wood chips                                 | Silviculture                                        | 11.156 (40.3%)           |
| 380 | Worker dispatching services                         | CM, CP & NG *                                       | 0.004 (2.8%)             | CM, CP & NG *                            | Private PG *                                        | 0.005 (2.3%)             | Wood chips                                 | Silviculture                                        | 0.625 (29.0%)            |
| 381 | Other business services                             | CM, CP & NG *                                       | 0.018 (2.9%)             | CM, CP & NG *                            | Private PG *                                        | 0.024 (2.4%)             | Wood chips                                 | Silviculture                                        | 1.457 (18.1%)            |

Table S4. Cont.

|     | GWP (t·CO <sub>2</sub> ·eq/million JPY)         |                                                     |                          | DAP (kg·SO <sub>2</sub> ·eq/million JPY) |                                                     |                          | WSI (m <sup>3</sup> ·water·eq/million JPY) |                                                     |                          |
|-----|-------------------------------------------------|-----------------------------------------------------|--------------------------|------------------------------------------|-----------------------------------------------------|--------------------------|--------------------------------------------|-----------------------------------------------------|--------------------------|
|     | Imported Raw Material <i>j</i>                  | Sector <i>i</i> Where Potential Impacts are Induced | Foreign Potential Impact | Imported Raw Material <i>j</i>           | Sector <i>i</i> Where Potential Impacts are Induced | Foreign Potential Impact | Imported Raw Material <i>j</i>             | Sector <i>i</i> Where Potential Impacts are Induced | Foreign Potential Impact |
| 382 | Movie theaters                                  | CM, CP & NG *                                       | 0.076 (2.8%)             | CM, CP & NG *                            | Private PG *                                        | 0.100 (3.2%)             | Wood chips                                 | Silviculture                                        | 2.530 (6.4%)             |
|     | Performances (except                            | CM, CP & NG *                                       | 0.038 (3.1%)             | CM, CP & NG *                            | Private PG *                                        | 0.050 (3.6%)             | Crops for feed *                           | Crops for feed *                                    | 20.563 (22.3%)           |
| 383 | otherwise classified),                          | CM, CP & NG *                                       | 0.072 (2.8%)             | CM, CP & NG *                            | Private PG *                                        | 0.095 (2.3%)             | Wood chips                                 | Silviculture                                        | 3.163 (10.9%)            |
|     | theatrical companies                            | CM, CP & NG *                                       | 0.042 (2.9%)             | CM, CP & NG *                            | Private PG *                                        | 0.055 (3.0%)             | Crops for feed *                           | Crops for feed *                                    | 31.109 (22.0%)           |
| 384 | Amusement and recreation facilities             | CM, CP & NG *                                       | 0.047 (3.0%)             | CM, CP & NG *                            | Private PG *                                        | 0.062 (3.0%)             | Crops for feed *                           | Crops for feed *                                    | 2.514 (8.1%)             |
|     | Stadiums and companies                          | CM, CP & NG *                                       | 0.062 (3.5%)             | CM, CP & NG *                            | Private PG *                                        | 0.082 (3.4%)             | Wood chips                                 | Silviculture                                        | 1.534 (7.9%)             |
| 385 | of bicycle, horse, motorcar and motorboat races | CM, CP & NG *                                       | 0.063 (2.3%)             | Frozen fish *                            | Marine fisheries                                    | 0.718 (10.7%)            | Edible crops *                             | Edible crops *                                      | 18.439 (8.4%)            |
|     | Sport facility service,                         | CM, CP & NG *                                       | 0.069 (2.6%)             | Frozen fish *                            | Marine fisheries                                    | 0.282 (6.3%)             | Edible crops *                             | Edible crops *                                      | 13.656 (7.5%)            |
| 386 | public gardens and amusement parks              | CM, CP & NG *                                       | 0.054 (2.6%)             | Frozen fish *                            | Marine fisheries                                    | 0.361 (9.2%)             | Edible crops *                             | Edible crops *                                      | 10.535 (8.1%)            |
| 387 | Other amusement and recreation services         | CM, CP & NG *                                       | 0.073 (2.6%)             | Frozen fish *                            | Marine fisheries                                    | 0.386 (7.1%)             | Edible crops *                             | Edible crops *                                      | 8.459 (6.4%)             |
|     | General eating and                              | CM, CP & NG *                                       | 0.063 (2.9%)             | CM, CP & NG *                            | Private PG *                                        | 0.083 (1.5%)             | Wood chips                                 | Silviculture                                        | 1.981 (4.5%)             |
| 388 | drinking places (except coffee shops)           | CM, CP & NG *                                       | 0.042 (3.2%)             | CM, CP & NG *                            | Private PG *                                        | 0.055 (5.3%)             | Wood chips                                 | Silviculture                                        | 1.207 (5.2%)             |
| 389 | Coffee shops                                    | CM, CP & NG *                                       | 0.032 (2.9%)             | CM, CP & NG *                            | Private PG *                                        | 0.042 (3.5%)             | Wood chips                                 | Silviculture                                        | 1.922 (5.3%)             |
| 390 | Eating and drinking places for pleasure         | CM, CP & NG *                                       |                          |                                          |                                                     |                          |                                            |                                                     |                          |
| 391 | Accommodation                                   | CM, CP & NG *                                       |                          |                                          |                                                     |                          |                                            |                                                     |                          |
| 392 | Cleaning                                        | CM, CP & NG *                                       |                          |                                          |                                                     |                          |                                            |                                                     |                          |
| 393 | Barber shops                                    | CM, CP & NG *                                       |                          |                                          |                                                     |                          |                                            |                                                     |                          |
| 394 | Beauty shops                                    | CM, CP & NG *                                       |                          |                                          |                                                     |                          |                                            |                                                     |                          |



Table S4. Cont.

|                                                                         | GWP (t·CO <sub>2</sub> ·eq/million JPY) |                                                     |                          | DAP (kg·SO <sub>2</sub> ·eq/million JPY) |                                                     |                          | WSI (m <sup>3</sup> ·water·eq/million JPY) |                                                     |                          |
|-------------------------------------------------------------------------|-----------------------------------------|-----------------------------------------------------|--------------------------|------------------------------------------|-----------------------------------------------------|--------------------------|--------------------------------------------|-----------------------------------------------------|--------------------------|
|                                                                         | Imported Raw Material <i>j</i>          | Sector <i>i</i> Where Potential Impacts are Induced | Foreign Potential Impact | Imported Raw Material <i>j</i>           | Sector <i>i</i> Where Potential Impacts are Induced | Foreign Potential Impact | Imported Raw Material <i>j</i>             | Sector <i>i</i> Where Potential Impacts are Induced | Foreign Potential Impact |
| 395Public baths<br>Other cleaning, barber                               | CM, CP & NG *                           | CM, CP & NG *                                       | 0.145 (3.0%)             | CM, CP & NG *                            | Private PG *                                        | 0.191 (5.5%)             | CM, CP & NG *                              | Silviculture                                        | 2.437 (1.6%)             |
| 396shops, beauty shops and public baths                                 | CM, CP & NG *                           | CM, CP & NG *                                       | 0.046 (2.7%)             | CM, CP & NG *                            | Private PG *                                        | 0.061 (3.2%)             | Wood chips                                 | Silviculture                                        | 3.589 (7.2%)             |
| 397Photographic studios                                                 | CM, CP & NG *                           | CM, CP & NG *                                       | 0.041 (3.2%)             | CM, CP & NG *                            | Private PG *                                        | 0.055 (2.5%)             | Wood chips                                 | Silviculture                                        | 2.879 (14.9%)            |
| 398Ceremonial occasions                                                 | CM, CP & NG *                           | CM, CP & NG *                                       | 0.080 (3.1%)             | CM, CP & NG *                            | Private PG *                                        | 0.106 (2.1%)             | Wood chips                                 | Silviculture                                        | 1.799 (3.9%)             |
| 399Miscellaneous repairs<br>Supplementary tutorial                      | CM, CP & NG *                           | CM, CP & NG *                                       | 0.059 (3.0%)             | CM, CP & NG *                            | Private PG *                                        | 0.078 (2.7%)             | Logs                                       | Silviculture                                        | 5.971 (16.9%)            |
| 400schools, instruction services for arts, culture and technical skills | CM, CP & NG *                           | CM, CP & NG *                                       | 0.035 (3.0%)             | CM, CP & NG *                            | Private PG *                                        | 0.046 (2.7%)             | Wood chips                                 | Silviculture                                        | 1.804 (11.8%)            |
| 401Other personal services                                              | CM, CP & NG *                           | CM, CP & NG *                                       | 0.038 (3.2%)             | CM, CP & NG *                            | Private PG *                                        | 0.050 (2.5%)             | Wood chips                                 | Silviculture                                        | 1.649 (11.0%)            |
| 402Office supplies                                                      | Pulp                                    | Pulp                                                | 0.081 (1.8%)             | Paper                                    | Paper                                               | 0.251 (2.2%)             | Wood chips                                 | Silviculture                                        | 91.748 (46.7%)           |
| 403Activities not elsewhere classified                                  | CM, CP & NG *                           | CM, CP & NG *                                       | 0.091 (3.0%)             | CM, CP & NG *                            | Private PG *                                        | 0.120 (2.9%)             | Wood chips                                 | Silviculture                                        | 5.455 (16.3%)            |

\*: Figures within parentheses indicate percentages in terms of the embodied GWP, DAP and WSI intensity of each sector under the DTA. Edible crops: other edible crops. Wheat & barley: wheat, barley and the like. CM, CP & NG: coal mining, crude petroleum and natural gas. Private PG: private power generation. Crops for feed: crops for feed and foraging. Frozen fish: frozen fish and shellfish. IW fisheries: inland water fisheries and culture. Slaughtering: slaughtering and meat processing. Industrial IC: other industrial inorganic chemicals. Final CP: other final chemical products. Inedible crops: other inedible crops. Aluminum: aluminum (including regenerated aluminum). NM ores: other non-metallic ores. Industrial WS: industrial water supply. NF metals: other non-ferrous metals. SM equipment: semiconductor making equipment. Special machinery: other special machinery for industrial use. S devices: semiconductor devices. Glass products: other glass products. E components: other electronic components. Jewelry: jewelry and adornments. Harbor transport: harbor transport service.

## References

1. National Institute of Environmental Studies, Japan (NIES). 3EID: Embodied Energy and Emission Intensity Data for Japan Using Input-Output Tables. Available online: [http://www.cger.nies.go.jp/publications/report/d031/eng/index\\_e.htm](http://www.cger.nies.go.jp/publications/report/d031/eng/index_e.htm) (accessed on 11 June 2015).
2. Nansai, K.; Moriguchi, Y.; Tohno, S. Compilation and Application of Japanese Inventories for Energy Consumption and Air Pollutant Emissions Using Input-Output Tables. *Environ. Sci. Technol.* **2003**, *37*, 2005–2015.
3. Wiedmann, T.; Barrett, J. A Review of the Ecological Footprint Indicator—Perceptions and Methods. *Sustainability* **2010**, *2*, 1645–1693.
4. Peters, G.P.; Hertwich, E.G. CO<sub>2</sub> Embodied in International Trade with Implication for Global Climate Policy. *Environ. Sci. Technol.* **2008**, *42*, 1401–1407.
5. EXIOBASE. Available online: <http://www.exiobase.eu/> (accessed on 11 June 2015).
6. Lenzen, M.; Moran, D.; Kanemoto, K.; Geschke, A. Building Eora: A Global Multi-Region Input-Output Database at High Country and Sector Resolution. *Econ. Syst. Res.* **2013**, *25*, 20–49.
7. Nansai, K.; Kondo, Y.; Kagawa, S.; Suh, S.; Nakajima, K.; Inaba, R.; Tohno, S. Estimates of Embodied Global Energy and Air-Emission Intensities of Japanese Products for Building a Japanese Input-Output Life Cycle Assessment Database with a Global System Boundary. *Environ. Sci. Technol.* **2012**, *46*, 9146–9154.
8. Hauschild, M.; Goedkoop, M.; Guinée, J.B.; Heijungs, R.; Huijbregts, M.; Jolliet, O.; Margni, M.; De Schryver, A.; Humbert, S.; Laurent, A.; *et al.* Identifying Best Existing Practice for Characterization Modeling in Life Cycle Impact Assessment. *Int. J. Life Cycle Assess.* **2013**, *18*, 683–697.
9. Finnveden, G.; Hauschild, M.Z.; Ekvall, T.; Guinée, J.; Heijungs, R.; Hellweg, S.; Koehler, A.; Pennington, D.; Suh, S. Recent Developments in Life Cycle Assessment. *J. Environ. Manag.* **2009**, *91*, 1–21.
10. Huijbregts, M.A.J.; Seppälä, J. Towards Region-specific, European Fate Factors for Airborne Nitrogen Compounds Causing Aquatic Eutrophication. *Int. J. Life Cycle Assess.* **2000**, *5*, 65–67.
11. Huijbregts, M.A.J.; Seppälä, J. Life Cycle Impact Assessment of Pollutants Causing Aquatic Eutrophication. *Int. J. Life Cycle Assess.* **2001**, *6*, 339–344.
12. Huijbregts, M. Life-Cycle Impact Assessment of Acidifying and Eutrophying Air Pollutants: Calculation of Equivalency Factors with RAINS-LCA, Draft Version. Available online: <http://cml.leiden.edu/research/industrialecology/researchprojects/finished/new-dutch-lca-guide.html> (accessed on 11 June 2015).
13. Huijbregts, M.A.J.; Schöpp, W.; Verkuijlen, E.; Heijungs, R.; Reijnders, L. Spatially Explicit Characterization of Acidifying and Eutrophying Air Pollution in Life-Cycle Assessment. *J. Ind. Ecol.* **2000**, *4*, 75–92.
14. Hauschild, M.; Potting, J. Spatial Differentiation in Life Cycle Impact Assessment—The EDIP 2003 Methodology; Environmental News No. 80, Danish Environmental Protection Agency. Available online: <http://www2.mst.dk/udgiv/publications/2005/87-7614-579-4/pdf/87-7614-580-8.pdf> (accessed on 11 June 2015).

15. Potting, J.; Schöpp, W.; Blok, K.; Hauschild, M. Site-dependent Life-Cycle Impact Assessment of Acidification. *J. Ind. Ecol.* **1998**, *2*, 63–87.
16. Potting, J.; Schöpp, W.; Blok, K.; Hauschild, M. Comparison of the Acidifying Impact from Emissions with Different Regional Origin in Life-Cycle Assessment. *J. Hazard. Mater.* **1998**, *61*, 155–162.
17. Goedkoop, M.; Heijungs, R.; Huijbregts, M.; de Schryver, A.; Struijs, J.; van Zelm, R. ReCiPe 2008: A Life Cycle Impact Assessment Method Which Comprises Harmonised Category Indicators at the Midpoint and the Endpoint Level, First Edition (version 1.08), Report I: Characterisation. Available online: <http://www.lcia-recipe.net/> (accessed on 11 June 2015).
18. Van Zelm, R.; Huijbregts, M.A.J.; Van Jaarsveld, H.A.; Reinds, G.J.; De Zwart, D.; Struijs, J.; Van de Meent, D. Time Horizon Dependent Characterization Factors for Acidification in Life-Cycle Assessment based on Forest Plant Species Occurrence in Europe. *Environ. Sci. Technol.* **2007**, *41*, 922–927.
19. Jolliet, O. IMPACT World+: A Regionalized LCIA Method at Global Level. In Proceedings of the International Symposium on Life Cycle Impact Assessment–Towards Development of Global Scale LCIA Method, Yokohama, Japan, 23 November 2012.
20. Itsubo, N. Development of LIME 3–Globalization of LCIA Methodology based on Endpoint Modeling. In Proceedings of the International Symposium on Life Cycle Impact Assessment–Towards Development of Global Scale LCIA Method, Yokohama, Japan, 23 November 2012.
21. Kounina, A.; Margni, M.; Bayart, J.B.; Boulay, A.M.; Berger, M.; Bulle, C.; Frischknecht, R.; Koehler, A.; Milà i Canals, L.; Motoshita, M.; *et al.* Review of Methods Addressing Freshwater Use in Life Cycle Inventory and Impact Assessment. *Int. J. Life Cycle Assess.* **2013**, *18*, 707–721.
22. Greenhouse Gas Inventory Office of Japan (GIO). National GHGs Inventory Report of JAPAN, April, 2009, CGER-Report, 2009. Available online: [http://www-gio.nies.go.jp/aboutghg/nir/nir-archives\\_e.html](http://www-gio.nies.go.jp/aboutghg/nir/nir-archives_e.html) (accessed on 11 June 2015).
23. Intergovernmental Panel on Climate Change (IPCC). Climate Change 1995: The Science of Climate Change, Contribution of Working Group I to the Second Assessment Report of the Intergovernmental Panel on Climate Change. Available online: [http://www.ipcc.ch/publications\\_and\\_data/publications\\_and\\_data\\_reports.shtml](http://www.ipcc.ch/publications_and_data/publications_and_data_reports.shtml) (accessed on 11 June 2015).
24. Itsubo, N.; Inaba, A. LIME 2: Life-cycle Impact assessment Method based on Endpoint modeling, JLCA Newsletter, Nos. 12–17, 2012–2014. Available online: <http://lca-forum.org/english/> (accessed on 11 June 2015).
25. Hayashi, K.; Okazaki, M.; Itsubo, N.; Inaba, A. Development of Damage Function of Acidification for Terrestrial Ecosystems based on the Effect of Aluminum Toxicity on Net Primary Production. *Int. J. Life Cycle Assess.* **2004**, *9*, 13–22.
26. Jolliet, O.; Margni, M.; Charles, R.; Humbert, S.; Payet, J.; Rebitzer, G.; Rosenbaum, R. IMPACT2002+: A New Life Cycle Impact Assessment Methodology. *Int. J. Life Cycle Assess.* **2003**, *8*, 324–330.
27. Guinée, J.B. Ed. *Handbook on Life Cycle Assessment. Operational Guide to the ISO Standards*; Kluwer Academic Publishers: Dordrecht, The Netherlands, 2002.

28. Hettelingh, J.P.; Posch, M.; Potting, J. Country-dependent Characterisation Factors for Acidification in Europe: A Critical Evaluation. *Int. J. Life Cycle* **2005**, *10*, 177–183.
29. Seppälä, J.; Posch, M.; Johansson, M.; Hettelingh, J.P. Country-dependent Characterisation Factors for Acidification and Terrestrial Eutrophication based on Accumulated Exceedance as an Impact Category Indicator. *Int. J. Life Cycle Assess.* **2006**, *11*, 403–416.
30. Posch, M.; Seppälä, J.; Hettelingh, J.P.; Johansson, M.; Margni, M.; Jolliet, O. The Role of Atmospheric Dispersion Models and Ecosystem Sensitivity in the Determination of Characterisation Factors for Acidifying and Eutrophying Emissions in LCIA. *Int. J. Life Cycle Assess.* **2008**, *13*, 477–486.
31. Interuniversity Research Centre for the Life Cycle of Products, Processes and Services (CIRAIG) Website. WaterUseImpacts. Available online: <http://www.ciraig.org/fr/wateruseimpacts.php> (accessed on 11 June 2015).
32. Boulay, A.M.; Bulle, C.; Bayart, J.B.; Deschênes, L.; Margni, M. Regional Characterization of Freshwater Use in LCA: Modeling Direct Impacts on Human Health. *Environ. Sci. Technol.* **2011**, *45*, 8948–8957.
33. Ono, Y.; Horiguchi, K.; Itsubo, N. Development of Water Footprint Inventory Database Using Input-Output Analysis in Japan. *J. Life Cycle Assess. Jpn.* **2013**, *9*, 108–115.
34. Itsubo, N. Laboratory, Tokyo City University Website. Database of the Amounts of Water Use & Consumption, Ver. 2. Available online: [http://www.yc.tcu.ac.jp/~itsubo-lab/research/water\\_db.html](http://www.yc.tcu.ac.jp/~itsubo-lab/research/water_db.html) (accessed on 11 June 2015).
35. Ministry of Finance, Japan (MOF) Website. Trade Statistics of Japan. Available online: [http://www.customs.go.jp/toukei/info/index\\_e.htm](http://www.customs.go.jp/toukei/info/index_e.htm) (accessed on 11 June 2015).

© 2015 by the authors; licensee MDPI, Basel, Switzerland. This article is an open access article distributed under the terms and conditions of the Creative Commons Attribution license (<http://creativecommons.org/licenses/by/4.0/>).
